# Supplementary material for: The Ameliorative Effects of Arctiin and Arctigenin on the Oxidative Injury of Lung Induced by Silica via TLR‐4/NLRP3/TGF‐β Signaling Pathway
Source: Hindawi journal article supplement (doi:10.1155/2021/5598980), 2021-01-01
Supplement: f1 [file 5598980.f1.pdf]

## **Supplemental materials and Methods**

### **Materials**

Arctiin and arctigenin were separated and purified by our laboratory and the final product shown an over 98% purity by HPLC detection. Trandrine tablets were provided by Zhejiang Jinhua Conba Bio-Pharm. CO., LTD. China. Silica (SiO<sub>2</sub> purity >99%, particle size 0.5-10 μm (approx. 80% between 1-5 μm) was purchased from Sigma, St., Louse, MO, USA. Penicillin G was supplied by North China Pharmaceutical Co., Ltd. 2-ketoglutaric acid, pyruvic acid, succinic acid, disodium fumarate, malic acid, stearic acid, 3-hydroxytyramine hydrochloride and mixed amino acid standards were purchased from Sigma, USA. Betaine, allantoin, inosine, taurine, creatinine, L-carnitine, creatine, urea and citric acid were recruited from Aladdin, USA. Sodium lactate, doxifluridine, D-(+)-pantothenic acid calcium salt and 6-hydroxypurine were purchased from the National Institutes for Food and Drug Control, China. TNF- $\alpha$ , IL-1 $\beta$ , NF- $\kappa$ B and TGF- $\beta$  ELISA kit (FANKEL BIO, Shanghai, China), Hydroxyproline (HYP), ceruloplasmin and lysozyme assay kits (Jiancheng Bioengineering Institute, Nanjing, China). The mitochondrial membrane potential assay kit (Beyotime Biotechnology, Shanghai, China.), reactive oxygen species assay kit (Jiancheng Bioengineering Institute, Nanjing, China.), SDS-PAGE Sample Loading Buffer (Beyotime, Shanghai, China), BCA Protein Assay Kit (Beyotime, Shanghai, China). Antibodies against the following proteins were used:  $\alpha$ -SMA, NF- $\kappa$ B, TLR-4, Myd88, NLRP3, ASC, cleaved Caspase-1 (Wanleibio, Shenyang, China),  $\beta$ -actin (Absci, USA), HRP-conjugated goat antirabbit IgG (Wanleibio, Shenyang, China), BeyoECL Plus (Beyotime, Shanghai, China).

### **Dose selection**

The daily dose interval of *Fructus Arctii* is 6 - 12 g according to Chinese Pharmacopoeia, in which the arctigenin account for 5% of *Fructus Arctii*. In this study, we selected the human dosage of 6 g/day (equivalent dosage of 300 mg/kg/day of arctigenin and about 30 mg/kg/day for rats equivalent dosage of arctigenin) as the low-dose reference and 60 mg/kg/day for the high-dose reference to investigate the therapeutic effect of different doses of arctigenin in silicosis rats.

Tetrandrine is widely used for silicosis therapy in clinical in China. The instruction of tetrandrine tablets indicated the dose against silicosis is 60mg-100mg/times, 3 times everyday. In this study, we selected the human dosage of 300mg daily (equivalent dosage of 31.25mg/kg/day for rats) and decided 30mg/kg/day as the positive drugs dosage.

### **Modeling methods**

Before modeling, rats were randomly equally divided into 9 groups, i.e. the control group (CON), the model group (MOD), positive control group (POS), low dose group of arctiin (ACL), high dose group of arctiin (ACH), low dose group of arctigenin (AGL), high dose group of arctigenin (AGH), arctiin + positive group (ACP) and arctigenin + positive group (AGP). Rats were modeled by tracheal intubation as the methods as follows. Rats were anesthetized by injecting 3% pentobarbital sodium (1 mL/kg body weight) in the abdominal cavity, then fixed limbs and placed on a board facing upward at an angle of approximately 45° by using elastic string carefully positioned under the animal's front incisors. The tongue was gently pulled out with forceps and sterilized stomach tube (2.0 mm diameters) was intubated into the trachea. Modeling suspension was instilled into the trachea via the catheter, then air injection to make sure suspension completely access into the trachea. Then whirling rats to make the drug distributed in vivo uniformly. The sham-operation group was given sterile saline with penicillin in the same operation. After modeling, the rats in different groups were continuously intragastrically administrated with the corresponding drug for 30 days.

Mental state evaluation standard: lively-0, slightly slow response and voluntary activity reduced-1, laziness, mental atrophy, curled up limbs, slow movement-2, malaise, aggressive and confrontational behavior disappeared-3. The respiratory rate was evaluated through the animal breaths in 1 min under quiet and repeat 3 times. The amount of dietary and drinking water was caculated by weight lost method.

### **Urine and serum samples preparation**

Urine samples were collected by metabolism cages at first week, thrid week and fifth week and the volume were recorded. All groups were weighted and then anesthetized

at 24 hours after the last administration, blood samples were drawn from every animal abdominal aorta and the serum was harvested by centrifuge. Serum and urine samples were prepared respectively according to the protocol as follows. Urine was centrifugated to remove particulates, then diluting with water (1:1) (brief vortex) vol/vol and stored at 4 °C before analysis. Serum was diluted with acetonitrile (1:2.5) (brief vortex) vol/vol and centrifugated to remove particulates. Then all the supernatant was removed and evaporated to dryness under nitrogen. The dry residue was reconstituted in acetonitrile and water mixture (1:1) (brief vortex), then centrifuged again at 100g for 3 min at 4 °C. All supernatant was collected and transferred into new vials and ready for UPLC/TOFMS analysis.

### **Chromatography conditions**

Metabolic profiling Chromatography: Chromatography was performed using a HPLC system (Agilent1290, USA) equipped with a TOF mass spectrometer (G1969A, Agilent). An aliquot of 2 µL of the serum sample solution (urine sample 5µL) was injected onto an ACQUITY UPLCTM HSS T3 column (100 mm×2.1 mm, 1.7 µm Waters Corp, Milford, USA) at 40°C with a flow rate of 0.40 mL/min (urine sample 0.50 mL/min). The mobile phases were composed of 0.1% formic acid in water (solvent A) and 0.1% formic acid in acetonitrile (solvent B), the gradient was used as follows: Next an aliquot of 2 µL of the serum sample solution was injected onto an Poroshell 120 HILIC-Z column (100 mm×2.1 mm, 2.7 µm, Agilent Technologies, USA) at 40°C with a flow rate of 0.40 mL/min. The mobile phases were composed of 10% ammonium acetate in water (solvent A) and, 10% ammonium acetate in acetonitrile (solvent B), the gradient was used as follows: Gradient elution program. The eluant was introduced to the mass spectrometer directly and analyzed with positive/negative electrospray ion source (ESI). The quality control (QC) sample was used to optimize the condition of UPLC-MS, as it contained most information on whole samples. After every 9 samples injected, a pooled sample as the QC sample followed by a blank was injected in order to secure the stability and repeatability of the UPLC-MS systems.

Mass spectrometry conditions: Source gas temperature was 350 °C. Fragmentor voltage

was 380 V. OCT IRF V<sub>pp</sub> was 750 V. V<sub>cap</sub> pressure was 4000 V (ESI+)/3500 V (ESI-). Nebulizer pressure was 35 psi. Drying gas flow was 15 L/min. Drying gas temperature was 200°C. The data acquisition rate was set to 5.0 Spectra·s<sup>-1</sup> and the mass range was set at *m/z* 50 -1200 using extended dynamic range.

### **Data processing and analysis**

The MassHunter Workstation software (version B.04.01 Qualitative analysis, Agilent) was used for feature extraction by the Molecular Feature Extractor (MFE) algorithm. The extracted compound list of QC was exported as Compound Exchange Format (.cef) file as target template for data extraction by Profinder (Version B. 08. 00, Agilent). The extracted data were export as EXCEL (.csv) file for further statistical analysis. In Simca-p 14.1 Workstations, the normalized data were then subjected to OPLS-DA. As a supervised pattern recognition method, PLS-DA could reflect the difference of distinct groups. It is a valuable visualization tool which we can show the different groups separated in the three-dimensional space.

### **Module difference analysis**

In this study, the MetScape plugin in Cytoscape software was used for network construction (parameters: build pathway-based network; organism: human; networktype: compound). Cytoscape and Network Analyzer were used to visualize the network and analyze the topology of this network. Six dimensions of topology parameters, including network centralization、Avg. number of neighbors、characteristic path length、 network density、 numbers of nodes and numbers of edges were selected to represent the network, and Euclidean distance was used to integrate these different dimensions. That is, assuming *a* is the structure of network A, whose topological state was described by its characteristics of space vector using the six dimensions of the topology parameters, namely, *a*<sub>1</sub>, *a*<sub>2</sub>, *a*<sub>3</sub>... *a*<sub>6</sub>. After the drug intervention, the topology of network A may change to network B, and the corresponding topological structure *b* was *b*<sub>1</sub>, *b*<sub>2</sub>, *b*<sub>3</sub>... *b*<sub>6</sub>. Notably, we defined the overlap structure (the same nodes and edges) of network A and B as the original nodes and edges, named (*a*<sub>7</sub>, *a*<sub>8</sub>) and (*b*<sub>7</sub>, *b*<sub>8</sub>). Here, the value of (*a*<sub>7</sub>, *a*<sub>8</sub>) is actually (0, 0) and (*b*<sub>7</sub>, *b*<sub>8</sub>) is the nodes and edges of network B from network A. The formula is as follows:

$$d = \sqrt{(a_1 - b_1)^2 + \dots (a_8 - b_8)^2}$$

### **Western blotting analysis**

The preparation of protein samples: The lung tissues and cells homogenates were prepared respectively by using RIPA Lysis Buffer containing protease and phosphatase inhibitors. Total protein content was determined by the BCA Protein Assay Kit according to manufacturer's instructions. Samples were stored at -80°C until analysis.

Western blot protocol: Before loaded, samples were denatured in SDS-PAGE Sample Loading Buffer by boiling for 5 min. Equal amount of protein extracts (25 mg) were subjected to 6-12% sodium dodecyl sulfate-polyacrylamide gel electrophoresis (SDS PAGE) and transferred to PVDF membrane. The PVDF membranes were then blocked in 5% nonfat milk for 2 hours at room temperature. The membranes were incubated with the specific primary antibodies. After washing the membranes with 1×TBST for 3 times, the slices were incubated with HRP-conjugated goat antirabbit IgG (1:7000 diluted with 1×TBST) for 2 hours at room temperature. We used ECL reagents to detect immunoreactive bands.

### **Isolation and culture of primary mouse lung fibroblasts**

The primary mouse lung fibroblasts (PLFs) were isolated from as described previously, with some modifications [22]. Briefly, Lung tissue collected from C57/BL6 mice (Liaoning Changsheng Biotechnology Co. Ltd, China. License Key: SCXK (Liao) 20150001) were minced into 1 to 2 mm<sup>3</sup> pieces and digested with trypsin for 15 min at 37 °C. The digested cell suspensions were collected and cultured with DMEM complete medium and incubated at 37 °C in an atmosphere of 5% CO<sub>2</sub> in air over night. After cells attached, the medium was changed the next day. The percentage of fibroblast was identified as 95% by morphology under microscope.

### **The cell cytotoxicity assay of arctiin and arctigenin**

Cell cytotoxicity was assayed by the MTT assay. Briefly, RAW264.7 were seeded in 96 well at 1×10<sup>5</sup> per well and incubated in DMEM containing 10% FBS for 24 h. Then were treated with SiO<sub>2</sub> (50 µg/mL) and some of them were incubated with arctiin and arctigenin at different concentrations (10, 1, 0.1, 0.01, 0.001 µM) for 24 h at 37 °C in

an atmosphere of 5% CO<sub>2</sub> in air. Then 5 mg/mL MTT was added to the wells and incubated for additional 4 h at 37 °C in an atmosphere of 5% CO<sub>2</sub> in air. After mixwell, the optical density was measured at 490 nm. And PLFs were seeded in 96 well at 5×10<sup>4</sup> cells per well and incubated in DMEM containing 10% FBS for 24 h. Then were treated with TGF-β1 (10 ng/mL) for 48 h and some of them were incubated with arctiin and arctigenin at different concentrations (100, 10, 1, 0.1 μM). Then MTT detection was consistent with above.

#### **Mitochondrial membrane potential detection**

RAW264.7 cells incubated with arctiin or arctigenin at 1μM and silica (50 μg/mL) together for 24 h coated 6-wells were collected and resuspended in fresh medium. After the addition of 1 mL JC-1 working solution, the cells were incubated at 37 °C in an atmosphere of 5% CO<sub>2</sub> in air for 20 min. The staining solution was removed by centrifugation and cells were washed with JC-1 staining buffer twice, then resuspended in fresh medium. Mitochondrial membrane potentials were monitored by determining the relative amounts of dual emissions from mitochondrial JC-1 monomers or aggregates using an Motic fluorescent microscope.

#### **Reactive oxygen species detection**

RAW264.7 cells incubated with arctiin or arctigenin at 1μM and silica (50 μg/mL) together for 24 h coated 6-wells were collected and resuspended in DCFH-DA probes diluted in PBS. Then the cells were incubated light-avoided at 37 °C in an atmosphere of 5% CO<sub>2</sub> in air for 60 min and agitated every 5 min to make cells fully contact with probes. After that, cells were obtained through centrifugation and washed 3 times with PBS, then resuspended in 500μL PBS. The production of ROS was determined through flow cytometry (Excitation wavelength 485 nm, emission wavelength 525 nm).

#### **Supplemental Figure Legends**

Figure S1 Lung tissues (a), H&E (b. 10×10, c. 20×10) and Masson (d. 10×10, e. 20×10) staining observation.

Figure S2 Mental state, body weight, fur luster, respiratory rate, urine volume, dietary amount and the amount of drinking water of rats (a-f). Organ coefficient (h. Lung

coefficient, i. spleen coefficient, j. thymus coefficient) Note: mean  $\pm$  SD, n = 8,  $\blacktriangle P < 0.05$ ,  $\blacktriangle\blacktriangle P < 0.01$  vs CON;  $*P < 0.05$ ,  $**P < 0.01$  vs MOD.

Figure S3 OPLS-DA plot of metabolomics (a. CON and MOD, b. All groups).

Figure S4 Arctiin and arctiin metabolites - target - PF interaction (a), PPI network (b), GO biological process (c), GO molecular function (d), KEGG pathway (e), Reactome pathway (f).

Figure S5 PPI network of related genes of arginine and proline metabolism and TLR-4 / NLRP3 /TGF- $\beta$  signaling.

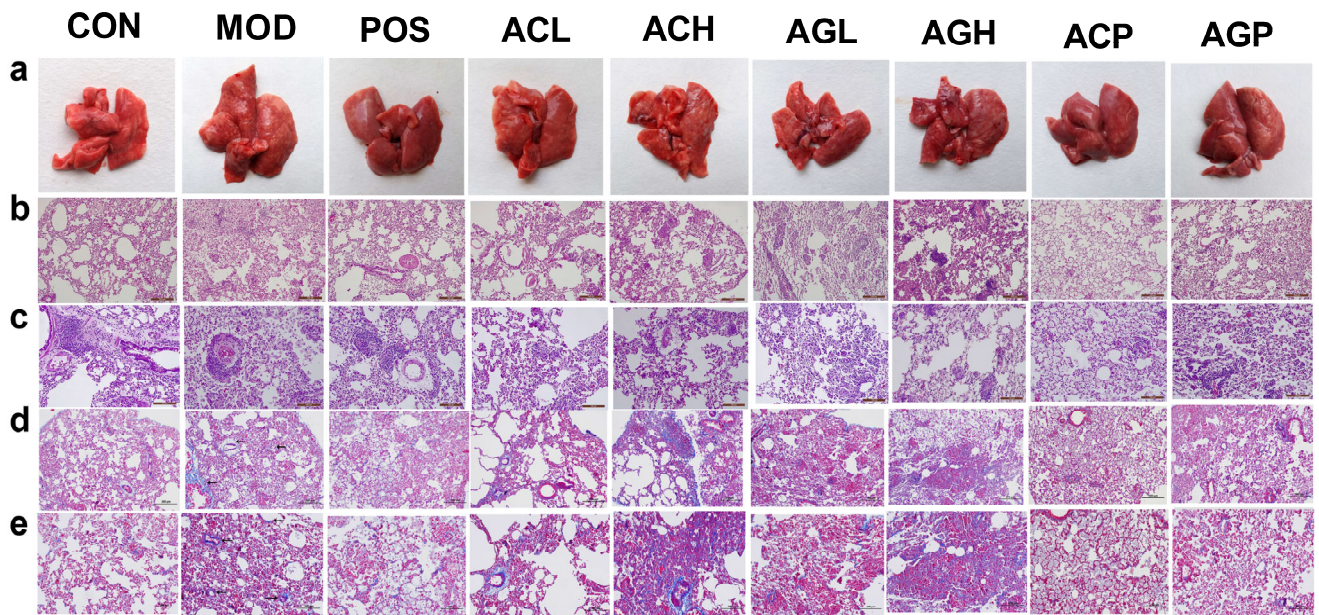

Figure S1 Lung tissues (a), H&E (b. 10×10, c. 20×10) and Masson (d. 10×10, e. 20×10) staining observation



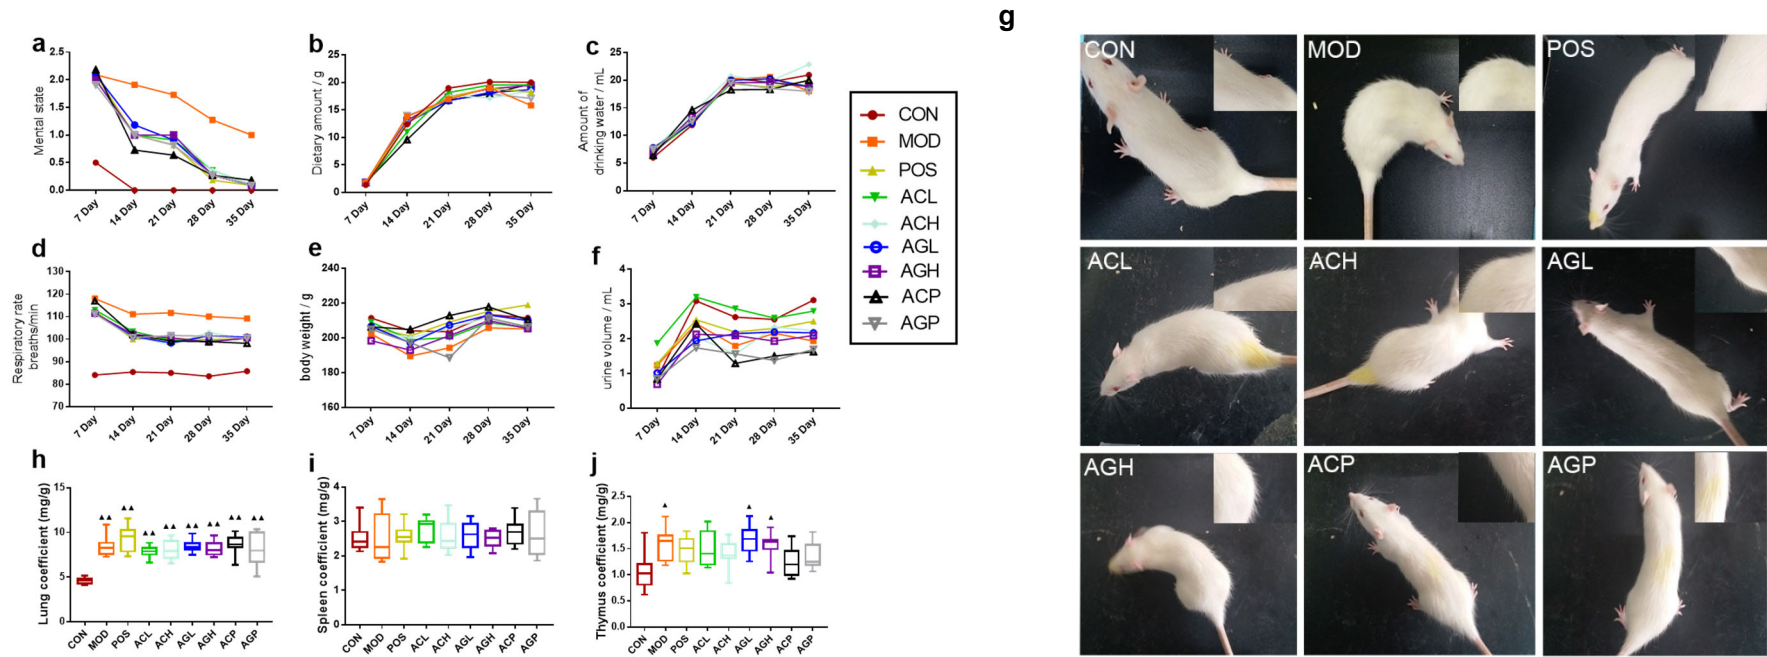

Figure S2 Mental state, body weight, fur luster, respiratory rate, urine volume, dietary amount and the amount of drinking water of rats (a-g). Organ coefficient (h. Lung coefficient, i. spleen coefficient, j. thymus coefficient) Note: mean  $\pm$  SD,  $n = 8$ ,  $\triangle P < 0.05$ ,  $\blacktriangle P < 0.01$  vs CON;  $*P < 0.05$ ,  $**P < 0.01$  vs MOD.

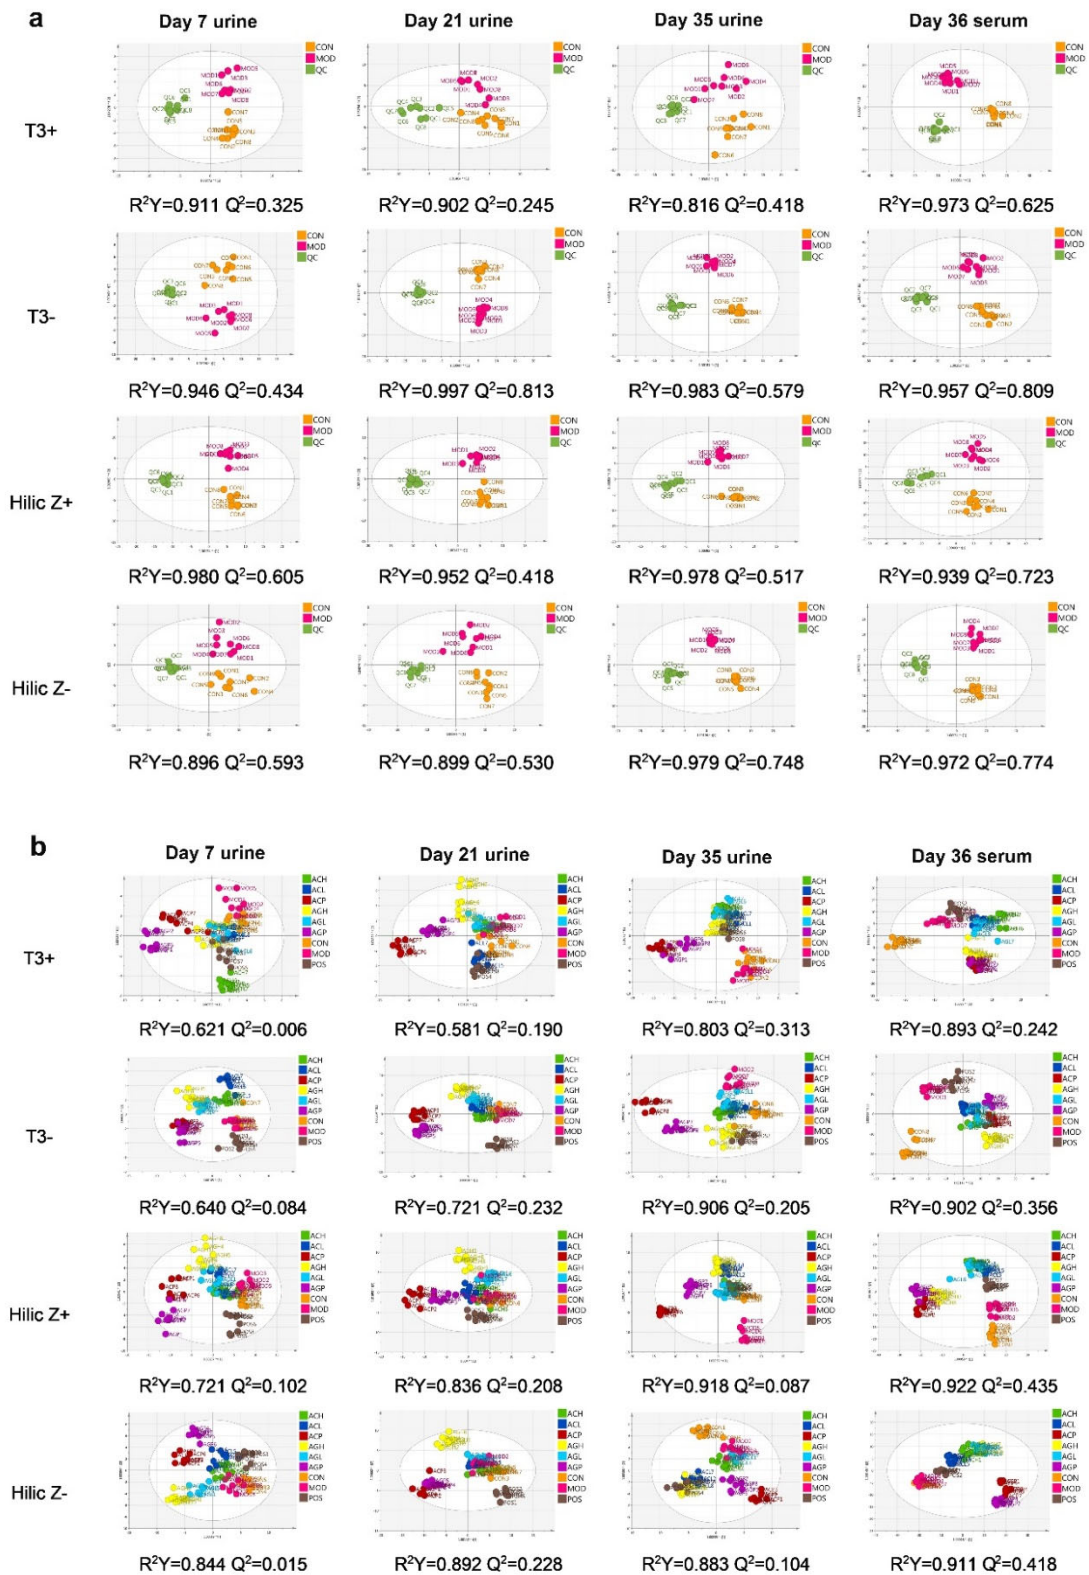

Figure S3 OPLS-DA plot of metabolomics (a. CON and MOD, b. All groups)

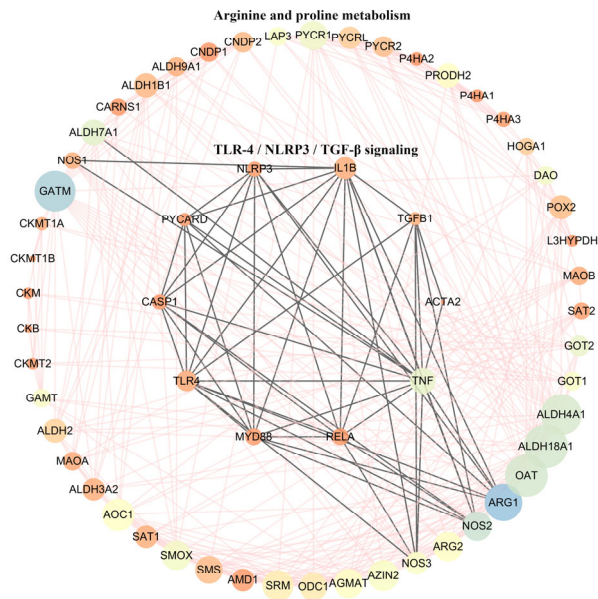

Figure S4 PPI network of related genes of arginine and proline metabolism and TLR-4 / NLRP3 /TGF-β signaling

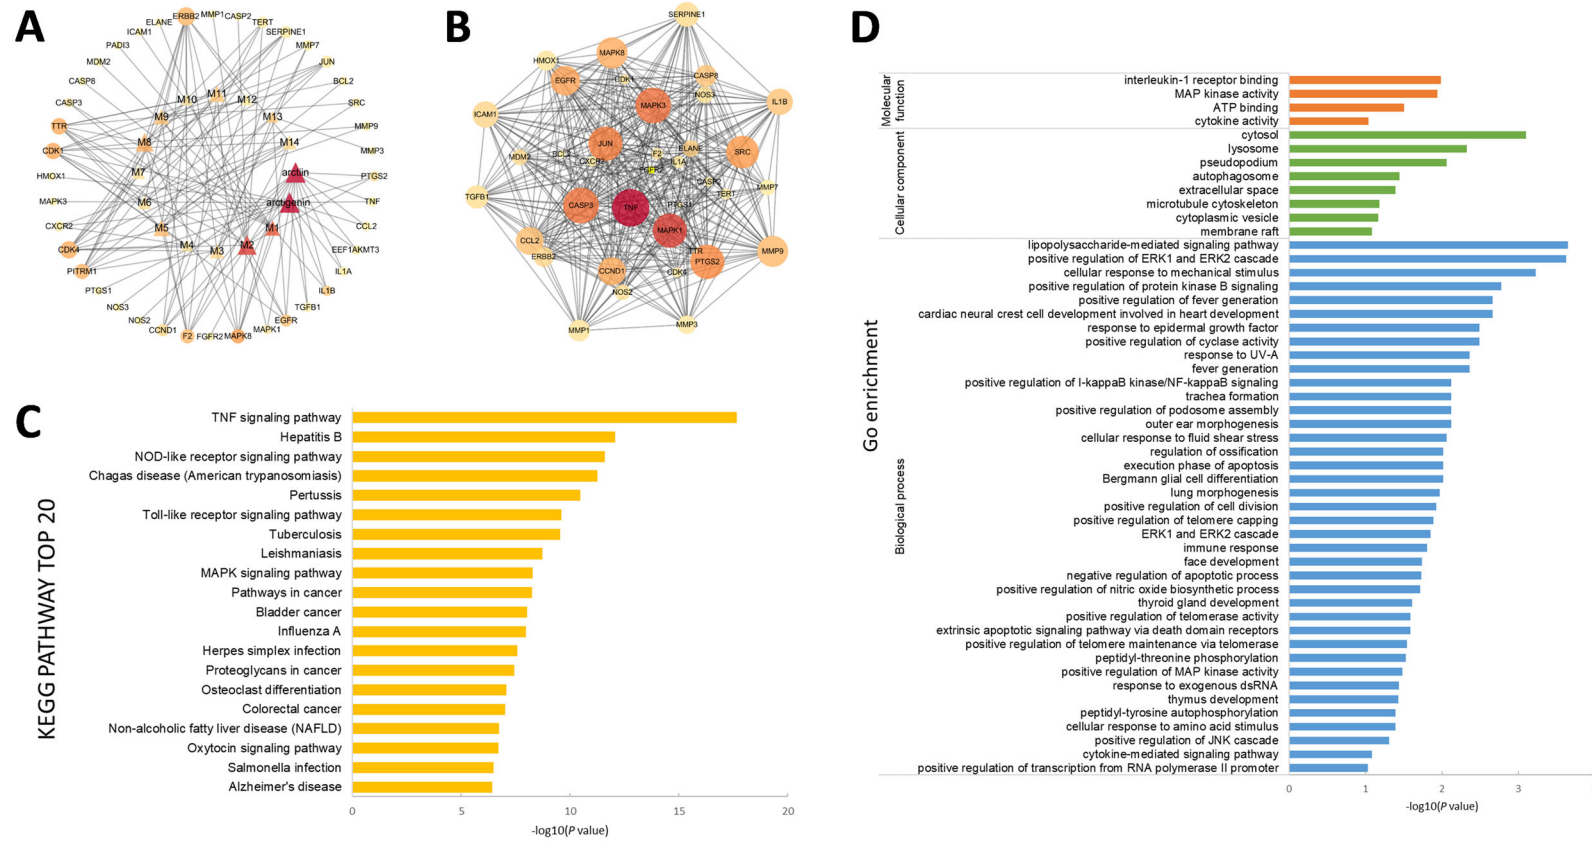

Figure S5 Arctiin and arctiin metabolites - target - PF interaction (A), PPI network (B), KEGG pathway (C), GO enrichment (D)

## Supplemental Table Legends

Table S1 Day 7 urine metabolites information. Notes: ★represent target metabolites, <sup>△</sup> represent differential metabolites in model, <sup>◊</sup>represent differential metabolites in arctiin, ●represent differential metabolites in arctigenin. “-” represent metabolites with down-regulated trend, “+” represent metabolites with up-regulated trend, “--” and “++” represent significant difference from control at  $P < 0.05$ , “---” and “+++” represent significant difference from control at  $P < 0.01$ .

Table S2 Day21 urine metabolites information. Notes: ★represent target metabolites, <sup>△</sup> represent differential metabolites in model, <sup>◊</sup>represent differential metabolites in arctiin, ●represent differential metabolites in arctigenin. “-” represent metabolites with down-regulated trend, “+” represent metabolites with up-regulated trend, “--” and “++” represent significant difference from control at  $P < 0.05$ , “---” and “+++” represent significant difference from control at  $P < 0.01$ .

Table S3 Day 35 urine metabolites information. Notes: ★represent target metabolites, <sup>△</sup> represent differential metabolites in model, <sup>◊</sup>represent differential metabolites in arctiin, ●represent differential metabolites in arctigenin. “-” represent metabolites with down-regulated trend, “+” represent metabolites with up-regulated trend, “--” and “++” represent significant difference from control at  $P < 0.05$ , “---” and “+++” represent significant difference from control at  $P < 0.01$ .

Table S4 Day36 serum metabolites information. Notes: ★represent target metabolites, <sup>△</sup> represent differential metabolites in model, <sup>◊</sup>represent differential metabolites in arctiin, ●represent differential metabolites in arctigenin. “-” represent metabolites with down-regulated trend, “+” represent metabolites with up-regulated trend, “--” and “++” represent significant difference from control at  $P < 0.05$ , “---” and “+++” represent significant difference from control at  $P < 0.01$ .

Table S5 Topological information of urine metabolites in various periods

Table S6 The importance of input nodes in modular network

Table S7 Oral bioavailability prediction of AdmetSAR2.0 web-survice

Table S8 XP Gscore of molecular docking studies

Table S1 Day 7 urine metabolites information.

| HMDB        | Ion mode | m/z     | R.T.<br>(min) | Mass   | Formula                                                       | VIP   | Compound Name                                 | MOD  | POS | ACL | ACH | AGL | AGH | ACP | AGP | Pathway                                                                                                                             |
|-------------|----------|---------|---------------|--------|---------------------------------------------------------------|-------|-----------------------------------------------|------|-----|-----|-----|-----|-----|-----|-----|-------------------------------------------------------------------------------------------------------------------------------------|
| HMDB0000251 | T3+      | 126.015 | 0.83          | 125.15 | C <sub>2</sub> H <sub>7</sub> NO <sub>3</sub> S               | 1.339 | Taurine*                                      | down | +   | +   | +   | +   | +   | +   | /   | Taurine and hypotaurine metabolism;<br>Primary bile acid biosynthesis                                                               |
| HMDB0000806 | T3+      | 229.209 | 10.99         | 228.37 | C <sub>14</sub> H <sub>28</sub> O <sub>2</sub>                | 3.461 | Myristic acid                                 | up   | -   | -   | -   | -   | -   | -   | -   | /                                                                                                                                   |
| HMDB0002820 | T3+      | 141.059 | 1.10          | 140.14 | C <sub>6</sub> H <sub>8</sub> N <sub>2</sub> O <sub>2</sub>   | 3.058 | Methylimidazoleacetic acid <sup>Δ</sup><br>○● | down | +++ | +   | +   | ++  | +++ | ++  | ++  | /                                                                                                                                   |
| HMDB0000860 | T3+      | 208.090 | 3.35          | 207.23 | C <sub>11</sub> H <sub>13</sub> NO <sub>3</sub>               | 2.226 | Phenylpropionylglycine <sup>Δ</sup>           | up   | -   | -   | -   | -   | /   | /   | /   | /                                                                                                                                   |
| HMDB0000701 | T3+      | 174.106 | 3.46          | 173.2  | C <sub>8</sub> H <sub>15</sub> NO <sub>3</sub>                | 2.130 | Hexanoylglycine <sup>Δ</sup>                  | up   | -   | -   | -   | -   | -   | -   | /   | /                                                                                                                                   |
| HMDB0011663 | T3+      | 181.043 | 2.91          | 180.16 | C <sub>9</sub> H <sub>8</sub> O <sub>4</sub>                  | 0.764 | 3-(4-Hydroxyphenyl)<br>pyruvate               | down | +   | +   | /   | +   | +   | +   | ++  | Tyrosine metabolism;<br>Phenylalanine, tyrosine and tryptophan biosynthesis;<br>Ubiquinone and other terpenoid/quinone biosynthesis |
| HMDB0000268 | T3+      | 351.246 | 4.92          | 350.49 | C <sub>21</sub> H <sub>34</sub> O <sub>4</sub>                | 0.484 | Tetrahydrocorticosterone                      | up   | /   | -   | -   | -   | -   | /   | /   | Steroid hormone biosynthesis                                                                                                        |
| HMDB0000101 | T3+      | 252.102 | 0.94          | 251.24 | C <sub>10</sub> H <sub>13</sub> N <sub>5</sub> O <sub>3</sub> | 1.240 | Deoxyadenosine                                | up   | /   | /   | -   | /   | /   | /   | -   | Purine metabolism                                                                                                                   |
| HMDB0004081 | T3+      | 249.116 | 7.44          | 248.27 | C <sub>13</sub> H <sub>16</sub> N <sub>2</sub> O <sub>3</sub> | 1.143 | 6-Hydroxymelatonin                            | up   | +   | -   | -   | -   | -   | /   | /   | Tryptophan metabolism                                                                                                               |
| HMDB0000210 | T3-      | 218.111 | 3.55          | 219.23 | C <sub>9</sub> H <sub>17</sub> NO <sub>5</sub>                | 0.824 | Pantothenic acid* <sup>○</sup>                | up   | /   | --  | -   | -   | /   | /   | /   | Pantothenate and CoA biosynthesis                                                                                                   |
| HMDB0000156 | T3-      | 133.022 | 0.86          | 134.09 | C <sub>4</sub> H <sub>6</sub> O <sub>5</sub>                  | 0.961 | L-Malic acid* <sup>○●</sup>                   | up   | -   | --  | --  | --  | -   | -   | -   | Pyruvate metabolism;<br>TCA cycle;<br>Glyoxylate and dicarboxylate metabolism                                                       |
| HMDB0000357 | T3-      | 103.030 | 3.83          | 104.10 | C <sub>4</sub> H <sub>8</sub> OS                              | 1.078 | 3-Hydroxybutyric acid* <sup>●</sup>           | down | /   | +   | /   | +   | ++  | +   | +   | Butanoate metabolism;<br>Synthesis and degradation of ketone bodies                                                                 |
| HMDB0000517 | T3-      | 173.11  | 3.54          | 174.20 | C <sub>6</sub> H <sub>14</sub> N <sub>4</sub> O <sub>2</sub>  | 1.162 | L-Arginine*                                   | down | +   | /   | /   | +   | +   | +   | +   | Arginine and proline metabolism;<br>Aminoacyl/tRNA biosynthesis; Arginine biosynthesis                                              |
| HMDB0003406 | T3-      | 104.043 | 1.22          | 105.09 | C <sub>3</sub> H <sub>7</sub> NO <sub>3</sub>                 | 0.801 | D-Serine*                                     | up   | /   | /   | /   | /   | /   | /   | /   | Glycine, serine and threonine metabolism                                                                                            |
| HMDB0000157 | T3-      | 135.038 | 1.22          | 136.11 | C <sub>5</sub> H <sub>4</sub> N <sub>4</sub> O                | 1.489 | Hypoxanthine <sup>●</sup>                     | down | /   | +   | /   | ++  | +++ | +++ | ++  | Purine metabolism                                                                                                                   |

|             |          |         |      |        |                                                               |       |                                       |      |     |     |    |     |     |     |     |                                                                      |
|-------------|----------|---------|------|--------|---------------------------------------------------------------|-------|---------------------------------------|------|-----|-----|----|-----|-----|-----|-----|----------------------------------------------------------------------|
| HMDB0000309 | T3-      | 181.044 | 1.22 | 182.14 | C <sub>6</sub> H <sub>6</sub> N <sub>4</sub> O <sub>3</sub>   | 0.822 | 1-Methyluric acid <sup>●</sup>        | down | /   | +   | /  | +   | ++  | ++  | /   | Caffeine metabolism                                                  |
| HMDB0000459 | T3-      | 156.074 | 3.71 | 157.17 | C <sub>7</sub> H <sub>11</sub> NO <sub>3</sub>                | 2.863 | 3-Methylcrotonylglycine <sup>Δ</sup>  | up   | -   | -   | -  | -   | /   | /   | -   | /                                                                    |
| HMDB0014511 | T3-      | 311.209 | 9.5  | 312.45 | C <sub>21</sub> H <sub>28</sub> O <sub>2</sub>                | 2.848 | Levonorgestrel <sup>Δ</sup>           | down | ++  | +   | +  | +   | /   | +   | +   | /                                                                    |
| HMDB0060014 | T3-      | 269.074 | 4.37 | 270.24 | C <sub>12</sub> H <sub>14</sub> O <sub>7</sub>                | 2.277 | Phenol glucuronide <sup>Δ</sup> ○     | down | +++ | +   | ++ | +   | /   | /   | +   | /                                                                    |
| HMDB0000531 | T3-      | 117.062 | 0.86 | 118.12 | C <sub>5</sub> H <sub>10</sub> O <sub>3</sub>                 | 2.248 | 3-Hydroxyvaleric acid <sup>Δ</sup> ○● | down | +   | ++  | +  | ++  | +   | ++  | ++  | /                                                                    |
| HMDB0000174 | T3-      | 163.068 | 0.85 | 164.16 | C <sub>6</sub> H <sub>12</sub> O <sub>5</sub>                 | 2.189 | L-Fucose <sup>Δ</sup> ○●              | down | +   | ++  | ++ | +++ | +++ | ++  | +++ | /                                                                    |
| HMDB0006372 | T3-      | 105.027 | 0.81 | 106.08 | C <sub>3</sub> H <sub>6</sub> O <sub>4</sub>                  | 2.078 | L-Glyceric acid <sup>Δ</sup>          | up   | -   | -   | -  | -   | /   | /   | /   | /                                                                    |
| HMDB0000043 | HILIC Z+ | 118.079 | 1.71 | 117.15 | C <sub>5</sub> H <sub>11</sub> NO <sub>2</sub>                | 0.691 | Betaine <sup>★</sup>                  | down | +   | +   | +  | +   | /   | /   | /   | Glycine, serine and threonine metabolism                             |
| HMDB0000073 | HILIC Z+ | 154.081 | 0.5  | 153.18 | C <sub>8</sub> H <sub>11</sub> NO <sub>2</sub>                | 2.307 | Dopamine <sup>★Δ</sup>                | up   | -   | -   | -  | /   | /   | /   | /   | Tyrosine metabolism                                                  |
| HMDB0000452 | HILIC Z+ | 104.064 | 1.99 | 103.12 | C <sub>4</sub> H <sub>9</sub> NO <sub>2</sub>                 | 0.051 | (S)-2-Aminobutanoic acid <sup>★</sup> | /    | -   | +   | +  | -   | -   | -   | -   | Cysteine and methionine metabolism                                   |
| HMDB0000696 | HILIC Z+ | 150.050 | 1.83 | 149.05 | C <sub>5</sub> H <sub>11</sub> NO <sub>2</sub> S              | 1.364 | L-Methionine <sup>★</sup>             | down | /   | +   | /  | /   | +   | /   | /   | Cysteine and methionine metabolism;<br>Aminoacyl/tRNA biosynthesis   |
| HMDB0003411 | HILIC Z+ | 116.063 | 0.93 | 115.13 | C <sub>5</sub> H <sub>9</sub> NO <sub>2</sub>                 | 2.236 | D-Proline <sup>★Δ</sup> ●             | up   | /   | -   | -  | -   | --- | --- | --- | Arginine and proline metabolism                                      |
| HMDB0002284 | HILIC Z+ | 145.126 | 1.62 | 144.21 | C <sub>7</sub> H <sub>16</sub> N <sub>2</sub> O               | 2.638 | N-Acetylleadaverine <sup>Δ</sup> ○●   | up   | -   | --- | -  | -   | --  | --  | -   | /                                                                    |
| HMDB0034708 | HILIC Z+ | 183.131 | 4.24 | 182.26 | C <sub>11</sub> H <sub>18</sub> O <sub>2</sub>                | 2.568 | Methyl 4,8-decadienoate <sup>Δ</sup>  | down | /   | /   | /  | /   | +   | +   | /   | /                                                                    |
| HMDB0013816 | HILIC Z+ | 205.152 | 1.59 | 206.33 | C <sub>14</sub> H <sub>20</sub> O                             | 2.436 | 2,4-Di-tert-butylphenol <sup>Δ</sup>  | up   | /   | -   | -  | /   | /   | -   | -   | /                                                                    |
| HMDB0002984 | HILIC Z+ | 307.220 | 0.62 | 306.44 | C <sub>19</sub> H <sub>30</sub> O <sub>3</sub>                | 2.306 | 11-Hydroxyandrosterone <sup>Δ</sup>   | up   | --- | -   | -  | -   | -   | /   | /   | /                                                                    |
| HMDB0094793 | HILIC Z+ | 198.105 | 2.24 | 197.23 | C <sub>10</sub> H <sub>15</sub> NO <sub>3</sub>               | 2.105 | 3,6-octadienoylglycine <sup>Δ</sup>   | up   | /   | /   | -  | /   | -   | -   | -   | /                                                                    |
| HMDB0001259 | HILIC Z+ | 103.032 | 2.81 | 102.08 | C <sub>4</sub> H <sub>6</sub> O <sub>3</sub>                  | 0.252 | Succinic acid semialdehyde            | /    | /   | +   | +  | +   | +   | +++ | +++ | Butanoate metabolism;<br>Alanine, aspartate and glutamate metabolism |
| HMDB0000068 | HILIC Z+ | 184.090 | 0.75 | 183.20 | C <sub>9</sub> H <sub>13</sub> NO <sub>3</sub>                | 0.578 | Epinephrine <sup>●</sup>              | /    | -   | -   | -  | -   | --  | --- | --- | Tyrosine metabolism                                                  |
| HMDB0000216 | HILIC Z+ | 170.074 | 1.07 | 169.17 | C <sub>8</sub> H <sub>11</sub> NO <sub>3</sub>                | 1.330 | Norepinephrine                        | down | -   | /   | /  | -   | /   | -   | /   | Tyrosine metabolism                                                  |
| HMDB0011631 | HILIC Z+ | 225.078 | 3.27 | 224.21 | C <sub>10</sub> H <sub>12</sub> N <sub>2</sub> O <sub>4</sub> | 1.524 | L-3-Hydroxykynurenine                 | up   | -   | /   | -  | /   | /   | /   | --  | Tryptophan metabolism                                                |
| HMDB0000472 | HILIC Z+ | 221.086 | 1.94 | 220.22 | C <sub>11</sub> H <sub>12</sub> N <sub>2</sub> O <sub>3</sub> | 0.737 | 5-Hydroxy-L-tryptophan                | up   | -   | /   | -  | +   | +   | +   | -   | Tryptophan metabolism                                                |
| HMDB0001085 | HILIC Z+ | 337.232 | 0.48 | 336.46 | C <sub>20</sub> H <sub>32</sub> O <sub>4</sub>                | 1.461 | Leukotriene B4                        | down | -   | -   | -  | -   | -   | -   | -   | Arachidonic acid metabolism                                          |
| HMDB0000673 | HILIC Z+ | 281.242 | 0.49 | 280.44 | C <sub>18</sub> H <sub>32</sub> O <sub>2</sub>                | 0.196 | Linoleic acid                         | /    | -   | -   | -  | -   | -   | --  | --  | Linoleic acid metabolism;                                            |



|             |          |         |      |        |                                                              |       |                                                              |      |    |    |    |    |    |    |    |                                                                |
|-------------|----------|---------|------|--------|--------------------------------------------------------------|-------|--------------------------------------------------------------|------|----|----|----|----|----|----|----|----------------------------------------------------------------|
| HMDB0000190 | HILIC Z- | 89.031  | 2.43 | 90.08  | C <sub>3</sub> H <sub>6</sub> O <sub>3</sub>                 | 0.551 | L-Lactic acid*                                               | down | +  | /  | /  | /  | /  | /  | /  | Biosynthesis of unsaturated fatty acids                        |
| HMDB0000725 | HILIC Z- | 130.058 | 3.41 | 131.13 | C <sub>5</sub> H <sub>9</sub> NO <sub>3</sub>                | 0.299 | 4-Hydroxyproline*                                            | /    | -  | /  | -  | -- | -  | /  | -  | Pyruvate metabolism                                            |
| HMDB0000763 | HILIC Z- | 190.058 | 0.64 | 191.18 | C <sub>10</sub> H <sub>9</sub> NO <sub>3</sub>               | 0.547 | 5-Hydroxyindoleacetic acid*<br>●                             | /    | -  | -  | /  | +  | ++ | ++ | /  | Arginine and proline metabolism                                |
| HMDB0000056 | HILIC Z- | 88.048  | 0.85 | 89.09  | C <sub>3</sub> H <sub>7</sub> NO <sub>2</sub>                | 1.209 | beta-Alanine*                                                | down | /  | /  | +  | /  | /  | /  | /  | Pantothenate and CoA biosynthesis;<br>beta/Alanine metabolism; |
| HMDB0001527 | HILIC Z- | 119.025 | 0.78 | 120.17 | C <sub>4</sub> H <sub>8</sub> O <sub>2</sub> S               | 0.243 | 3-Methylthiopropionic acid                                   | /    | /  | /  | +  | +  | +  | +  | +  | Pyrimidine metabolism;                                         |
| HMDB0002820 | HILIC Z- | 139.058 | 1.83 | 140.13 | C <sub>6</sub> H <sub>8</sub> N <sub>2</sub> O <sub>2</sub>  | 2.806 | Methylimidazoleacetic acid <sup>Δ</sup>                      | down | ++ | +  | +  | +  | +  | ++ | ++ | Propanoate metabolism                                          |
| HMDB0000574 | HILIC Z- | 120.020 | 1.30 | 121.15 | C <sub>3</sub> H <sub>7</sub> NO <sub>2</sub> S              | 0.071 | L-Cysteine                                                   | up   | -  | -  | -  | -  | /  | -  | -  | Cysteine and methionine metabolism                             |
| HMDB0003681 | HILIC Z- | 144.074 | 1.84 | 145.15 | C <sub>6</sub> H <sub>11</sub> NO <sub>3</sub>               | 2.543 | 4-Acetamidobutanoic acid <sup>Δ</sup><br>○●                  | down | +  | ++ | ++ | ++ | +  | +  | +  | Histidine metabolism                                           |
| HMDB0000227 | HILIC Z- | 147.074 | 1.05 | 148.15 | C <sub>6</sub> H <sub>12</sub> O <sub>4</sub>                | 1.663 | Mevalonic acid <sup>○</sup>                                  | down | /  | -  | -- | +  | +  | /  | -  | Pantothenate and CoA biosynthesis;                             |
| HMDB0000479 | HILIC Z- | 168.085 | 2.39 | 169.18 | C <sub>7</sub> H <sub>11</sub> N <sub>3</sub> O <sub>2</sub> | 0.213 | 1-Methylhistidine                                            | /    | -  | -  | -  | +  | +  | -  | -  | Cysteine and methionine metabolism;                            |
| HMDB0059727 | HILIC Z- | 173.089 | 1.03 | 174.19 | C <sub>8</sub> H <sub>14</sub> O <sub>4</sub>                | 2.949 | 2,4-Dimethyladipic acid <sup>Δ</sup>                         | up   | -  | -  | -  | -  | /  | /  | -  | Taurine and hypotaurine metabolism;                            |
| HMDB0010313 | HILIC Z- | 313.064 | 1.18 | 314.24 | C <sub>13</sub> H <sub>14</sub> O <sub>9</sub>               | 3.082 | 1-Salicylate glucuronide <sup>Δ</sup> <sup>○</sup>           | down | +  | +  | ++ | +  | +  | +  | ++ | Glycine, serine and threonine metabolism;                      |
| HMDB0031306 | HILIC Z- | 127.047 | 1.41 | 128.13 | C <sub>6</sub> H <sub>8</sub> O <sub>3</sub>                 | 2.694 | 3-Hydroxy-4,5-dimethyl-<br>2(5H)-furanone <sup>Δ</sup><br>○● | down | ++ | +  | ++ | ++ | ++ | /  | +  | Aminoacyl/tRNA biosynthesis;                                   |

|             |          |         |      |        |                                                             |       |                                                   |      |    |     |     |     |    |   |    |                                                                   |
|-------------|----------|---------|------|--------|-------------------------------------------------------------|-------|---------------------------------------------------|------|----|-----|-----|-----|----|---|----|-------------------------------------------------------------------|
| HMDB0059767 | HILIC Z- | 187.068 | 1.41 | 188.18 | C <sub>8</sub> H <sub>12</sub> O <sub>5</sub>               | 2.694 | Tetrahydro-2,5-furan-diacetic acid <sup>Δ</sup> ● | down | ++ | +   | ++  | ++  | ++ | / | +  | Fatty acid biosynthesis                                           |
| HMDB0000339 | HILIC Z- | 158.090 | 1.84 | 159.18 | C <sub>7</sub> H <sub>13</sub> NO <sub>3</sub>              | 2.655 | 2-Methylbutyrylglycine <sup>Δ</sup> ●             | down | ++ | +++ | +++ | +++ | +  | + | +  | /                                                                 |
| HMDB0000343 | HILIC Z- | 285.158 | 0.47 | 286.37 | C <sub>18</sub> H <sub>22</sub> O <sub>3</sub>              | 2.549 | 2-Hydroxyestrone <sup>Δ</sup>                     | down | +  | /   | +   | +   | +  | / | /  | Steroid hormone biosynthesis                                      |
| HMDB0000300 | HILIC Z- | 111.028 | 0.63 | 112.09 | C <sub>4</sub> H <sub>4</sub> N <sub>2</sub> O <sub>2</sub> | 1.968 | Uracil <sup>Δ</sup>                               | up   | /  | -   | -   | -   | -  | - | -  | Pantothenate and CoA biosynthesis;<br>beta/Alanine metabolism;    |
| HMDB0000751 | HILIC Z- | 149.053 | 2.66 | 150.13 | C <sub>5</sub> H <sub>10</sub> O <sub>5</sub>               | 1.482 | L-Xylulose <sup>Δ</sup> ○                         | up   | -  | --  | -   | -   | -  | / | -- | Pyrimidine metabolism<br>Pentose and glucuronate interconversions |

Table S2 Day 21 urine metabolites information.

| HMDB/KEGG   | Ion mode | m/z     | R.T.<br>(min) | Mass   | Formula                                                       | VIP   | Compound Name                                    | MOD  | POS | ACL | ACH | AGL | AGH | ACP | AGP | Pathway                                                                                                                     |
|-------------|----------|---------|---------------|--------|---------------------------------------------------------------|-------|--------------------------------------------------|------|-----|-----|-----|-----|-----|-----|-----|-----------------------------------------------------------------------------------------------------------------------------|
| HMDB0000073 | T3+      | 154.079 | 1.38          | 153.18 | C <sub>8</sub> H <sub>11</sub> NO <sub>2</sub>                | 0.349 | Dopamine <sup>*</sup>                            | up   | --- | -   | -   | -   | -   | --  | --  | Tyrosine metabolism                                                                                                         |
| HMDB0000195 | T3+      | 269.081 | 3.43          | 268.23 | C <sub>10</sub> H <sub>12</sub> N <sub>4</sub> O <sub>5</sub> | 1.074 | Inosine <sup>*</sup>                             | up   | -   | -   | -   | -   | -   | --- | --- | Purine metabolism                                                                                                           |
| HMDB0000251 | T3+      | 126.015 | 0.85          | 125.15 | C <sub>2</sub> H <sub>7</sub> NO <sub>3</sub> S               | 1.051 | Taurine <sup>*</sup> ○                           | up   | /   | -   | --  | -   | -   | -   | -   | Taurine and hypotaurine metabolism;<br>Primary bile acid biosynthesis                                                       |
| HMDB0000291 | T3+      | 199.053 | 0.81          | 198.17 | C <sub>9</sub> H <sub>10</sub> O <sub>5</sub>                 | 2.180 | 4-Hydroxy-3-methoxymandelic acid <sup>*</sup> Δ○ | down | +   | +   | ++  | +   | +   | ++  | ++  | Tyrosine metabolism                                                                                                         |
| HMDB0000574 | T3+      | 122.019 | 3.99          | 121.15 | C <sub>3</sub> H <sub>7</sub> NO <sub>2</sub> S               | 1.332 | L-Cysteine                                       | up   | /   | +   | /   | -   | /   | +   | +   | Pantothenate and CoA biosynthesis;<br>Taurine and hypotaurine metabolism;<br>Cysteine and methionine metabolism;            |
| HMDB0004081 | T3+      | 249.116 | 7.51          | 248.27 | C <sub>13</sub> H <sub>16</sub> N <sub>2</sub> O <sub>3</sub> | 2.204 | 6-Hydroxymelatonin <sup>Δ</sup>                  | down | +   | /   | /   | /   | /   | /   | /   | Thiamine metabolism;<br>Glutathione metabolism;<br>Aminoacyl-tRNA biosynthesis;<br>Glycine, serine and threonine metabolism |

|             |     |         |       |        |                                                               |       |                                               |      |     |    |    |    |     |     |     |                                           |
|-------------|-----|---------|-------|--------|---------------------------------------------------------------|-------|-----------------------------------------------|------|-----|----|----|----|-----|-----|-----|-------------------------------------------|
| HMDB0000299 | T3+ | 285.076 | 3.16  | 284.22 | C <sub>10</sub> H <sub>12</sub> N <sub>4</sub> O <sub>6</sub> | 0.572 | Xanthosine                                    | up   | -   | -  | -  | -  | -   | -   | -   | Purine metabolism                         |
| HMDB0000259 | T3+ | 177.095 | 3.12  | 176.22 | C <sub>10</sub> H <sub>12</sub> N <sub>2</sub> O              | 3.228 | Serotonin <sup>Δ</sup>                        | up   | --- | -  | -  | -  | -   | --  | --  | Tryptophan metabolism                     |
|             |     |         |       |        |                                                               |       |                                               |      |     |    |    |    |     |     |     | Primary bile acid biosynthesis;           |
|             |     |         |       |        |                                                               |       |                                               |      |     |    |    |    |     |     |     | Glutathione metabolism;                   |
| HMDB0000123 | T3- | 74.032  | 4.22  | 75.07  | C <sub>2</sub> H <sub>5</sub> NO <sub>2</sub>                 | 0.253 | Glycine*                                      | /    | -   | /  | +  | +  | +   | -   | --- | Aminoacyl-tRNA biosynthesis;              |
|             |     |         |       |        |                                                               |       |                                               |      |     |    |    |    |     |     |     | Glycine, serine and threonine metabolism; |
|             |     |         |       |        |                                                               |       |                                               |      |     |    |    |    |     |     |     | Porphyrin and chlorophyll metabolism;     |
|             |     |         |       |        |                                                               |       |                                               |      |     |    |    |    |     |     |     | Glyoxylate and dicarboxylate metabolism   |
| HMDB0000210 | T3- | 218.11  | 3.23  | 219.23 | C <sub>9</sub> H <sub>17</sub> NO <sub>5</sub>                | 1.409 | Pantothenic acid* <sup>Δ</sup>                | up   | -   | -  | /  | -  | /   | /   | /   | Pantothenate and CoA biosynthesis         |
| HMDB0000619 | T3- | 407.287 | 7.69  | 408.57 | C <sub>24</sub> H <sub>40</sub> O <sub>5</sub>                | 0.095 | Cholic acid*                                  | /    | -   | +  | -  | -  | +   | /   | /   | Primary bile acid biosynthesis            |
| HMDB0000309 | T3- | 181.044 | 1.3   | 182.14 | C <sub>6</sub> H <sub>6</sub> N <sub>4</sub> O <sub>3</sub>   | 0.092 | 1-Methyluric acid                             | /    | -   | -  | -  | +  | +   | +   | +   | Caffeine metabolism                       |
|             |     |         |       |        |                                                               |       |                                               |      |     |    |    |    |     |     |     | Linoleic acid metabolism;                 |
| HMDB0000593 | T3- | 784.596 | 11.03 | 785.11 | C <sub>44</sub> H <sub>84</sub> NO <sub>8</sub> P             | 1.189 | PC(18:1(9Z)/18:1(9Z)) <sup>○●</sup>           | up   | --  | -  | -- | -  | --- | --- | --  | Arachidonic acid metabolism;              |
|             |     |         |       |        |                                                               |       |                                               |      |     |    |    |    |     |     |     | alpha-Linolenic acid metabolism;          |
|             |     |         |       |        |                                                               |       |                                               |      |     |    |    |    |     |     |     | Glycerophospholipid metabolism            |
|             |     |         |       |        |                                                               |       |                                               |      |     |    |    |    |     |     |     | Linoleic acid metabolism;                 |
| HMDB0008591 | T3- | 782.578 | 0.63  | 783.09 | C <sub>44</sub> H <sub>82</sub> NO <sub>8</sub> P             | 1.404 | PC(22:2(13Z,16Z)/14:1(9Z))                    | up   | -   | -  | /  | +  | +   | +   | +   | Arachidonic acid metabolism;              |
|             |     |         |       |        |                                                               |       |                                               |      |     |    |    |    |     |     |     | Alpha-inolenic acid metabolism;           |
|             |     |         |       |        |                                                               |       |                                               |      |     |    |    |    |     |     |     | Glycerophospholipid metabolism            |
|             |     |         |       |        |                                                               |       |                                               |      |     |    |    |    |     |     |     | Pantothenate and CoA biosynthesis;        |
| HMDB0000300 | T3- | 111.026 | 1.07  | 112.08 | C <sub>4</sub> H <sub>4</sub> N <sub>2</sub> O <sub>2</sub>   | 0.063 | Uracil                                        | /    | -   | +  | +  | +  | +   | +   | +   | beta-Alanine metabolism;                  |
|             |     |         |       |        |                                                               |       |                                               |      |     |    |    |    |     |     |     | Pyrimidine metabolism                     |
| HMDB0000068 | T3- | 182.09  | 4.35  | 183.2  | C <sub>9</sub> H <sub>13</sub> NO <sub>3</sub>                | 0.924 | Epinephrine                                   | up   | /   | -  | -  | -  | /   | --  | --  | Tyrosine metabolism                       |
| HMDB0000347 | T3- | 287.172 | 6.46  | 288.38 | C <sub>18</sub> H <sub>24</sub> O <sub>3</sub>                | 2.321 | 16b-Hydroxyestradiol <sup>○●</sup>            | up   | --- | -  | -- | -- | -   | --- | --- | /                                         |
| HMDB0059731 | T3- | 155.042 | 2.83  | 156.14 | C <sub>7</sub> H <sub>8</sub> O <sub>4</sub>                  | 1.935 | 2,3-Methyleneglutaric acid <sup>Δ</sup><br>○● | down | +   | ++ | +  | ++ | ++  | +   | ++  | /                                         |

|             |          |         |      |        |                                                               |       |                                                   |      |    |     |    |   |     |     |     |                                                                      |
|-------------|----------|---------|------|--------|---------------------------------------------------------------|-------|---------------------------------------------------|------|----|-----|----|---|-----|-----|-----|----------------------------------------------------------------------|
| HMDB0000673 | T3-      | 279.24  | 9.42 | 280.45 | C <sub>18</sub> H <sub>32</sub> O <sub>2</sub>                | 2.000 | Linoleic acid <sup>Δ</sup>                        | up   | -  | /   | -  | - | /   | -   | -   | Linoleic acid metabolism                                             |
| HMDB0000531 | T3-      | 117.063 | 2.92 | 118.13 | C <sub>5</sub> H <sub>10</sub> O <sub>3</sub>                 | 1.475 | 3-Hydroxyvaleric acid <sup>Δ</sup> ●              | down | /  | ++  | +  | + | ++  | ++  | ++  | /                                                                    |
| HMDB0002511 | T3-      | 237.084 | 6.29 | 238.24 | C <sub>12</sub> H <sub>14</sub> O <sub>5</sub>                | 1.683 | 3,4,5-Trimethoxycinnamic acid <sup>Δ</sup>        | down | /  | /   | /  | / | /   | +   | /   | /                                                                    |
| HMDB0000909 | T3-      | 157.094 | 6.58 | 158.2  | C <sub>8</sub> H <sub>14</sub> O <sub>3</sub>                 | 1.856 | trans-4-Hydroxycyclohexylacetic acid <sup>Δ</sup> | down | +  | +   | +  | + | +   | /   | /   | /                                                                    |
| HMDB0000452 | HILIC Z+ | 104.064 | 2.01 | 103.12 | C <sub>4</sub> H <sub>9</sub> NO <sub>2</sub>                 | 1.834 | (S)-2-Aminobutanoate <sup>★</sup> ●               | up   | -  | -   | -  | / | --  | -   | -   | Cysteine and methionine metabolism                                   |
| HMDB0000696 | HILIC Z+ | 150.051 | 1.87 | 149.05 | C <sub>5</sub> H <sub>11</sub> NO <sub>2</sub> S              | 0.545 | L-Methionine <sup>★</sup>                         | up   | -  | /   | /  | / | +   | +   | +   | Cysteine and methionine metabolism;<br>Aminoacyl-tRNA biosynthesis   |
| HMDB0011631 | HILIC Z+ | 225.079 | 3.28 | 224.21 | C <sub>10</sub> H <sub>12</sub> N <sub>2</sub> O <sub>4</sub> | 0.819 | L-3-Hydroxykynurenine                             | down | +  | +   | +  | - | +   | +   | +   | Tryptophan metabolism                                                |
| HMDB0001259 | HILIC Z+ | 103.032 | 2.84 | 102.08 | C <sub>4</sub> H <sub>6</sub> O <sub>3</sub>                  | 0.241 | Succinic acid semialdehyde                        | /    | +  | +   | /  | / | +   | +   | +   | Butanoate metabolism;<br>Alanine, aspartate and glutamate metabolism |
| HMDB0000289 | HILIC Z+ | 169.028 | 1.51 | 168.11 | C <sub>5</sub> H <sub>4</sub> N <sub>4</sub> O <sub>3</sub>   | 0.857 | Uric acid                                         | /    | +  | -   | +  | + | -   | --  | --- | Purine metabolism                                                    |
| HMDB0000216 | HILIC Z+ | 170.075 | 1.57 | 169.17 | C <sub>8</sub> H <sub>11</sub> NO <sub>3</sub>                | 0.849 | Norepinephrine ●                                  | /    | +  | +   | +  | + | +++ | /   | /   | Tyrosine metabolism                                                  |
| HMDB0000472 | HILIC Z+ | 221.085 | 1.96 | 220.22 | C <sub>11</sub> H <sub>12</sub> N <sub>2</sub> O <sub>3</sub> | 0.711 | 5-Hydroxy-L-tryptophan                            | up   | -  | +   | -  | + | +   | +   | +   | Tryptophan metabolism                                                |
| HMDB0001085 | HILIC Z+ | 337.232 | 0.48 | 336.46 | C <sub>20</sub> H <sub>32</sub> O <sub>4</sub>                | 0.874 | Leukotriene B4                                    | up   | -  | -   | -  | - | -   | --- | --- | Arachidonic acid metabolism                                          |
| HMDB0004827 | HILIC Z+ | 144.095 | 1.6  | 143.18 | C <sub>7</sub> H <sub>13</sub> NO <sub>2</sub>                | 1.770 | Proline betaine <sup>Δ</sup>                      | down | /  | /   | /  | / | /   | /   | /   | /                                                                    |
| HMDB0170858 | HILIC Z+ | 101.053 | 2.98 | 100.12 | C <sub>5</sub> H <sub>8</sub> O <sub>2</sub>                  | 2.588 | 3-Methylbut-3-enoic acid <sup>Δ</sup> ○ ●         | up   | -  | --- | -- | - | --- | -   | -   | /                                                                    |
| HMDB0000806 | HILIC Z+ | 229.209 | 0.3  | 228.37 | C <sub>14</sub> H <sub>28</sub> O <sub>2</sub>                | 1.509 | Myristic acid <sup>Δ</sup> ●                      | up   | /  | /   | /  | - | --  | -   | -   | /                                                                    |
| HMDB0094806 | HILIC Z+ | 200.121 | 2.96 | 199.25 | C <sub>10</sub> H <sub>17</sub> NO <sub>3</sub>               | 1.841 | 7-octenoylglycine <sup>Δ</sup>                    | down | +  | +   | +  | + | +   | +   | +   | /                                                                    |
| HMDB0094793 | HILIC Z+ | 198.107 | 4.16 | 197.23 | C <sub>10</sub> H <sub>15</sub> NO <sub>3</sub>               | 1.946 | 3,6-octadienoylglycine <sup>Δ</sup>               | down | ++ | +   | +  | + | +   | +   | +   | /                                                                    |
| HMDB0000357 | HILIC Z- | 103.047 | 2.49 | 104.1  | C <sub>4</sub> H <sub>8</sub> O <sub>3</sub>                  | 1.501 | 3-Hydroxybutyric acid <sup>★Δ</sup>               | down | /  | /   | /  | / | /   | /   | /   | Butanoate metabolism;<br>Synthesis and degradation of ketone bodies  |

|             |          |         |      |        |                                                               |       |                                                 |      |     |    |   |   |    |     |     |                                                                                                                   |
|-------------|----------|---------|------|--------|---------------------------------------------------------------|-------|-------------------------------------------------|------|-----|----|---|---|----|-----|-----|-------------------------------------------------------------------------------------------------------------------|
| HMDB0000763 | HILIC Z- | 190.058 | 0.63 | 191.18 | C <sub>10</sub> H <sub>9</sub> NO <sub>3</sub>                | 0.628 | 5-Hydroxyindoleacetic acid*                     | /    | -   | -  | / | / | +  | +   | +   | Tryptophan metabolism                                                                                             |
| HMDB0000725 | HILIC Z- | 130.058 | 3.48 | 131.13 | C <sub>5</sub> H <sub>9</sub> NO <sub>3</sub>                 | 1.119 | 4-Hydroxyproline*                               | up   | --- | -  | - | - | -  | -   | -   | Arginine and proline metabolism                                                                                   |
| HMDB0000056 | HILIC Z- | 88.048  | 0.86 | 89.09  | C <sub>3</sub> H <sub>7</sub> NO <sub>2</sub>                 | 1.512 | beta-Alanine*                                   | /    | -   | -  | / | - | -- | --  | --- | Pantothenate and CoA biosynthesis;<br>beta-Alanine metabolism;<br>Pyrimidine metabolism;<br>Propanoate metabolism |
| HMDB0000562 | HILIC Z- | 114.063 | 1.39 | 115.13 | C <sub>5</sub> H <sub>9</sub> NO <sub>2</sub>                 | 0.657 | D-Proline*                                      | /    | -   | /  | + | - | /  | +   | +   | Arginine and proline metabolism                                                                                   |
| HMDB0000673 | HILIC Z- | 279.24  | 0.43 | 280.44 | C <sub>18</sub> H <sub>32</sub> O <sub>2</sub>                | 0.166 | Linoleic acid                                   | up   | -   | +  | - | + | ++ | -   | +   | Linoleic acid metabolism;<br>Biosynthesis of unsaturated fatty acids                                              |
| HMDB0004073 | HILIC Z- | 174.063 | 1.23 | 175.18 | C <sub>10</sub> H <sub>9</sub> N <sub>2</sub> O <sub>2</sub>  | 0.097 | 5-Hydroxyindoleacetaldehyde                     | /    | -   | /  | / | / | +  | +   | +   | Tryptophan metabolism                                                                                             |
| HMDB0000132 | HILIC Z- | 150.05  | 1.16 | 151.12 | C <sub>5</sub> H <sub>5</sub> N <sub>5</sub> O                | 0.949 | Guanine                                         | up   | -   | -  | - | - | -  | -   | /   | Purine metabolism                                                                                                 |
| HMDB0001139 | HILIC Z- | 353.241 | 0.49 | 354.48 | C <sub>20</sub> H <sub>34</sub> O <sub>5</sub>                | 0.228 | Prostaglandin F2a                               | up   | +   | -  | - | + | +  | +   | +   | Arachidonic acid metabolism                                                                                       |
| HMDB0000071 | HILIC Z- | 251.086 | 2.81 | 252.23 | C <sub>10</sub> H <sub>12</sub> N <sub>4</sub> O <sub>4</sub> | 1.667 | Deoxyinosine                                    | down | -   | +  | + | + | +  | +   | /   | Purine metabolism                                                                                                 |
| HMDB0002820 | HILIC Z- | 139.058 | 1.88 | 140.13 | C <sub>6</sub> H <sub>8</sub> N <sub>2</sub> O <sub>2</sub>   | 1.278 | Methylimidazoleacetic acid                      | down | +   | -  | - | / | /  | +   | +   | Histidine metabolism                                                                                              |
| HMDB0003681 | HILIC Z- | 144.074 | 1.91 | 145.15 | C <sub>6</sub> H <sub>11</sub> NO <sub>3</sub>                | 2.521 | 4-Acetamidobutanoic acid <sup>Δ</sup>           | up   | -   | -  | - | - | /  | -   | --- | Arginine and proline metabolism                                                                                   |
| HMDB0000227 | HILIC Z- | 147.074 | 1.03 | 148.15 | C <sub>6</sub> H <sub>12</sub> O <sub>4</sub>                 | 0.021 | Mevalonic acid <sup>○</sup>                     | /    | +   | ++ | + | + | +  | ++  | ++  | Terpenoid backbone biosynthesis                                                                                   |
| HMDB0034520 | HILIC Z- | 645.372 | 1.15 | 646.8  | C <sub>36</sub> H <sub>54</sub> O <sub>10</sub>               | 0.589 | Gypsogenin 3-O-β-D-glucuronide                  | up   | -   | -  | - | - | /  | +++ | ++  | /                                                                                                                 |
| HMDB0000606 | HILIC Z- | 147.037 | 1.46 | 148.11 | C <sub>5</sub> H <sub>8</sub> O <sub>5</sub>                  | 1.067 | 2-Hydroxyglutarate                              | down | -   | +  | + | - | +  | +   | +   | Butanoate metabolism                                                                                              |
| HMDB0000479 | HILIC Z- | 168.085 | 2.51 | 169.18 | C <sub>7</sub> H <sub>11</sub> N <sub>3</sub> O <sub>2</sub>  | 0.004 | 1-Methylhistidine                               | /    | -   | -  | - | / | -  | +   | +   | Histidine metabolism                                                                                              |
| HMDB0000725 | HILIC Z- | 216.988 | 1.05 | 218.18 | C <sub>7</sub> H <sub>6</sub> O <sub>6</sub> S                | 2.303 | 4-hydroxybenzoic acid-4-O-sulphate <sup>Δ</sup> | up   | --  | -  | - | / | /  | /   | /   | /                                                                                                                 |
| HMDB0000603 | HILIC Z- | 199.105 | 0.53 | 200.23 | C <sub>10</sub> H <sub>16</sub> O <sub>4</sub>                | 2.132 | cis-4-Decenedioic acid <sup>Δ</sup>             | up   | --- | /  | / | / | -  | -   | -   | /                                                                                                                 |
| HMDB0000751 | HILIC Z- | 149.053 | 2.48 | 150.13 | C <sub>5</sub> H <sub>10</sub> O <sub>5</sub>                 | 1.755 | L-Xylulose <sup>Δ</sup>                         | down | /   | /  | / | / | /  | /   | /   | Pentose and glucuronate interconversions                                                                          |

|             |          |         |      |        |                                                              |       |                                    |      |   |   |   |   |    |   |   |    |   |   |
|-------------|----------|---------|------|--------|--------------------------------------------------------------|-------|------------------------------------|------|---|---|---|---|----|---|---|----|---|---|
| HMDB0011723 | HILIC Z- | 192.074 | 1.47 | 193.2  | C <sub>10</sub> H <sub>11</sub> NO <sub>3</sub>              | 1.864 | 2-Methylhippuric acid <sup>Δ</sup> | up   | - | - | - | - | -  | - | - | -  | / |   |
| HMDB0000418 | HILIC Z- | 377.204 | 0.86 | 378.46 | C <sub>21</sub> H <sub>30</sub> O <sub>6</sub>               | 1.716 | 18-Hydroxycortisol <sup>Δ</sup>    | down | / | / | / | / | /  | / | / | /  | / | / |
| HMDB0000620 | HILIC Z- | 129.026 | 2.56 | 130.1  | C <sub>5</sub> H <sub>6</sub> O <sub>4</sub>                 | 1.748 | Glutaconic acid <sup>Δ</sup>       | up   | - | - | - | / | -  | / | - | -  | / |   |
| HMDB0000508 | HILIC Z- | 151.068 | 2.3  | 152.15 | C <sub>5</sub> H <sub>12</sub> O <sub>5</sub>                | 2.161 | Ribitol <sup>Δ●</sup>              | up   | - | - | - | - | -- | - | - | -  | / |   |
| HMDB0000845 | HILIC Z- | 252.082 | 2.81 | 253.21 | C <sub>9</sub> H <sub>11</sub> N <sub>5</sub> O <sub>4</sub> | 2.180 | Neopterin <sup>Δ</sup>             | up   | - | - | - | - | -  | - | - | -- | / |   |

Table S3 Day 35 urine metabolites information.

| HMDB        | Ion mode | m/z     | R.T.<br>(min) | Mass   | Formula                                                      | VIP   | Compound Name                           | MOD  | POS | ACL | ACH | AGL | AGH | ACP | AGP | Pathway                                                                                                                                      |
|-------------|----------|---------|---------------|--------|--------------------------------------------------------------|-------|-----------------------------------------|------|-----|-----|-----|-----|-----|-----|-----|----------------------------------------------------------------------------------------------------------------------------------------------|
| HMDB0000210 | T3+      | 220.111 | 3.57          | 219.23 | C <sub>9</sub> H <sub>17</sub> NO <sub>5</sub>               | 0.528 | Pantothenic acid <sup>★</sup>           | /    | -   | -   | -   | -   | -   | -   | -   | Pantothenate and CoA biosynthesis                                                                                                            |
| HMDB0000517 | T3+      | 175.112 | 4.83          | 174.20 | C <sub>6</sub> H <sub>14</sub> N <sub>4</sub> O <sub>2</sub> | 0.423 | L-Arginine <sup>★</sup>                 | /    | +   | /   | /   | /   | /   | ++  | +   | Arginine biosynthesis;<br>Arginine and proline metabolism;<br>Aminoacyl/tRNA biosynthesis                                                    |
| HMDB0000268 | T3+      | 351.246 | 4.82          | 350.49 | C <sub>21</sub> H <sub>34</sub> O <sub>4</sub>               | 1.704 | Tetrahydrocorticosterone <sup>Δ</sup>   | up   | -   | -   | /   | /   | /   | /   | /   | Steroid hormone biosynthesis                                                                                                                 |
| HMDB0001259 | T3+      | 103.032 | 4.09          | 102.08 | C <sub>4</sub> H <sub>6</sub> O <sub>3</sub>                 | 0.327 | Succinic acid semialdehyde <sup>●</sup> | /    | +   | /   | +   | ++  | ++  | +++ | +++ | Butanoate metabolism;<br>Alanine, aspartate and glutamate metabolism                                                                         |
| HMDB0001851 | T3+      | 153.067 | 4.42          | 152.14 | C <sub>5</sub> H <sub>12</sub> O <sub>5</sub>                | 1.759 | L-Arabitol <sup>Δ</sup>                 | up   | /   | /   | /   | /   | /   | /   | /   | Pentose and glucuronate interconversions                                                                                                     |
| HMDB0000630 | T3+      | 112.043 | 0.86          | 111.1  | C <sub>4</sub> H <sub>5</sub> N <sub>3</sub> O               | 2.558 | Cytosine <sup>Δ○●</sup>                 | down | ++  | +++ | +++ | +++ | +++ | +++ | +++ | /                                                                                                                                            |
| HMDB0002064 | T3+      | 131.111 | 3.36          | 166.65 | C <sub>6</sub> H <sub>14</sub> N <sub>2</sub> O              | 2.047 | N-Acetylputrescine <sup>Δ●</sup>        | down | +   | +   | /   | +   | ++  | +   | +   | Arginine and proline metabolism                                                                                                              |
| HMDB0011309 | T3+      | 770.598 | 5.64          | 770.11 | C <sub>44</sub> H <sub>84</sub> NO <sub>7</sub> P            | 1.655 | PC(P-18:1(9Z)/18:1(9Z)) <sup>Δ●</sup>   | down | /   | -   | -   | --- | /   | --- | /   | /                                                                                                                                            |
| HMDB0000357 | T3-      | 103.047 | 0.79          | 104.10 | C <sub>4</sub> H <sub>8</sub> O <sub>3</sub>                 | 1.943 | 3-Hydroxybutyric acid <sup>★Δ</sup>     | down | /   | +   | +   | +   | /   | /   | /   | Butanoate metabolism;<br>Synthesis and degradation of ketone bodies                                                                          |
| HMDB0000123 | T3-      | 74.032  | 4.26          | 75.07  | C <sub>2</sub> H <sub>5</sub> NO <sub>2</sub>                | 2.383 | Glycine <sup>★Δ</sup>                   | up   | -   | -   | -   | -   | -   | --- | -   | Glutathione metabolism;<br>Porphyrin and chlorophyll metabolism;<br>Aminoacyl/tRNA biosynthesis;<br>Glyoxylate and dicarboxylate metabolism; |

|             |          |         |      |        |                                                              |       |                                                                         |    |     |     |     |     |     |     |     |                                           |
|-------------|----------|---------|------|--------|--------------------------------------------------------------|-------|-------------------------------------------------------------------------|----|-----|-----|-----|-----|-----|-----|-----|-------------------------------------------|
|             |          |         |      |        |                                                              |       |                                                                         |    |     |     |     |     |     |     |     | Glycine, serine and threonine metabolism; |
|             |          |         |      |        |                                                              |       |                                                                         |    |     |     |     |     |     |     |     | Primary bile acid biosynthesis            |
|             |          |         |      |        |                                                              |       |                                                                         |    |     |     |     |     |     |     |     | Pantothenate and CoA biosynthesis;        |
| HMDB0000300 | T3-      | 111.027 | 2.81 | 112.08 | C <sub>4</sub> H <sub>4</sub> N <sub>2</sub> O <sub>2</sub>  | 1.161 | Uracil <sup>●</sup>                                                     | up | +   | -   | -   | --  | -   | /   | -   | beta/Alanine metabolism;                  |
|             |          |         |      |        |                                                              |       |                                                                         |    |     |     |     |     |     |     |     | Pyrimidine metabolism                     |
| HMDB0000068 | T3-      | 182.09  | 4.37 | 183.2  | C <sub>9</sub> H <sub>13</sub> NO <sub>3</sub>               | 0.055 | Epinephrine <sup>●</sup>                                                | /  | +   | -   | -   | --  | -   | --- | -   | Tyrosine metabolism                       |
| HMDB0000157 | T3-      | 135.038 | 1.39 | 136.11 | C <sub>5</sub> H <sub>4</sub> N <sub>4</sub> O               | 0.113 | Hypoxanthine                                                            | /  | +   | -   | +   | +   | -   | /   | -   | Purine metabolism                         |
| HMDB0003357 | T3-      | 173.099 | 1.5  | 174.19 | C <sub>7</sub> H <sub>14</sub> N <sub>2</sub> O <sub>3</sub> | 0.622 | N-Acetylmethionine                                                      | /  | --  | -   | +   | -   | +   | +   | -   | Arginine biosynthesis                     |
|             |          |         |      |        |                                                              |       |                                                                         |    |     |     |     |     |     |     |     | Arginine biosynthesis;                    |
| HMDB0000214 | T3-      | 131.09  | 1.5  | 132.16 | C <sub>5</sub> H <sub>12</sub> N <sub>2</sub> O <sub>2</sub> | 0.987 | Ornithine                                                               | /  | -   | -   | -   | -   | -   | /   | -   | Arginine and proline metabolism;          |
|             |          |         |      |        |                                                              |       |                                                                         |    |     |     |     |     |     |     |     | Sulfur metabolism                         |
| HMDB0003099 | T3-      | 181.044 | 1.41 | 182.14 | C <sub>6</sub> H <sub>6</sub> N <sub>4</sub> O <sub>3</sub>  | 1.723 | 1-Methyluric acid <sup>▲●</sup>                                         | up | -   | -   | -   | -   | --  | -   | --  | Caffeine metabolism                       |
| HMDB0094793 | T3-      | 196.105 | 6.03 | 197.23 | C <sub>10</sub> H <sub>15</sub> NO <sub>3</sub>              | 1.828 | 3,6-octadienylglycine <sup>▲○●</sup>                                    | up | -   | --  | --  | --  | -   | --- | --- | /                                         |
|             |          |         |      |        |                                                              |       |                                                                         |    |     |     |     |     |     |     |     |                                           |
| HMDB0059975 | T3-      | 289.046 | 4.48 | 290.29 | C <sub>11</sub> H <sub>14</sub> O <sub>7</sub> S             | 1.677 | 4-Hydroxy-5-(3'-hydroxyphenyl)- valeric acid-3'-O-sulphate <sup>▲</sup> | up | --  | -   | /   | /   | -   | /   | -   | /                                         |
|             |          |         |      |        |                                                              |       |                                                                         |    |     |     |     |     |     |     |     |                                           |
| HMDB0000806 | T3-      | 227.209 | 7.06 | 228.37 | C <sub>14</sub> H <sub>28</sub> O <sub>2</sub>               | 2.133 | Myristic acid <sup>▲○●</sup>                                            | up | --- | --  | --- | --  | -   | --  | --  | /                                         |
| HMDB0013816 | T3-      | 203.151 | 7.26 | 206.33 | C <sub>14</sub> H <sub>20</sub> O                            | 1.921 | 2,4-Di-tert-butylphenol <sup>▲●</sup>                                   | up | -   | --- | --  | --- | -   | -   | -   | /                                         |
| HMDB0000063 | T3-      | 361.209 | 7.48 | 362.46 | C <sub>21</sub> H <sub>30</sub> O <sub>5</sub>               | 1.927 | Cortisol <sup>▲●</sup>                                                  | up | --- | -   | -   | --- | --  | -   | -   | Steroid hormone biosynthesis              |
| HMDB0001861 | HILIC Z+ | 126.095 | 3.49 | 125.17 | C <sub>6</sub> H <sub>11</sub> N <sub>3</sub>                | 2.708 | 3-Methylhistamine <sup>▲○●</sup>                                        | up | --- | --- | --  | --- | --- | --- | --- | /                                         |
| HMDB0002277 | HILIC Z+ | 343.204 | 0.49 | 342.43 | C <sub>18</sub> H <sub>30</sub> O <sub>6</sub>               | 1.822 | 2,3-Dinor-6-keto-prostaglandin F1 a <sup>▲○●</sup>                      | up | --- | --- | -   | --- | --- | -   | -   | /                                         |
|             |          |         |      |        |                                                              |       |                                                                         |    |     |     |     |     |     |     |     |                                           |
| HMDB0011253 | HILIC Z+ | 794.598 | 2.08 | 794.14 | C <sub>46</sub> H <sub>84</sub> NO <sub>7</sub> P            | 2.041 | PC(P-18:0/20:4(5Z,8Z,11Z,14Z)) <sup>▲</sup>                             | up | -   | -   | --  | -   | --- | -   | -   | /                                         |

|             |          |         |      |        |                                                               |       |                                                            |      |     |     |     |     |     |     |     |     |                                          |
|-------------|----------|---------|------|--------|---------------------------------------------------------------|-------|------------------------------------------------------------|------|-----|-----|-----|-----|-----|-----|-----|-----|------------------------------------------|
| HMDB0059768 | HILIC Z+ | 199.089 | 5.32 | 198.22 | C <sub>10</sub> H <sub>14</sub> O <sub>4</sub>                | 2.108 | 3,4-Methylene suberic acid <sup>Δ</sup> ○<br>●             | up   | --  | --  | --- | --  | --  | --  | --- | /   |                                          |
| HMDB0004073 | HILIC Z+ | 176.063 | 1.99 | 175.18 | C <sub>10</sub> H <sub>9</sub> NO <sub>2</sub>                | 1.761 | 5-Hydroxyindoleacetaldehyde<br>△○                          | up   | -   | --  | --  | -   | -   | -   | -   | -   | Tryptophan metabolism                    |
| HMDB0000339 | HILIC Z+ | 160.09  | 4.99 | 159.18 | C <sub>7</sub> H <sub>13</sub> NO <sub>3</sub>                | 1.495 | 2-Methylbutyrylglycine <sup>Δ</sup> ●                      | up   | -   | -   | -   | --- | -   | -   | -   | /   |                                          |
| HMDB0000022 | HILIC Z+ | 168.095 | 5.24 | 167.21 | C <sub>9</sub> H <sub>13</sub> NO <sub>2</sub>                | 1.685 | 3-Methoxytyramine <sup>Δ</sup> ○                           | up   | -   | --  | -   | -   | -   | -   | -   | -   | Tyrosine metabolism                      |
| HMDB0061384 | HILIC Z+ | 185.121 | 5.24 | 184.24 | C <sub>9</sub> H <sub>16</sub> N <sub>2</sub> O <sub>2</sub>  | 1.685 | N-(3-acetamidopropyl)pyrrolidin-2-one <sup>Δ</sup> ○       | up   | -   | --  | -   | -   | -   | -   | -   | -   | /                                        |
| HMDB0010313 | HILIC Z+ | 315.064 | 3.76 | 314.25 | C <sub>13</sub> H <sub>14</sub> O <sub>9</sub>                | 1.926 | 1-Salicylate glucuronide <sup>Δ</sup> ○                    | up   | -   | -   | --  | -   | -   | -   | -   | -   | /                                        |
| HMDB0000195 | HILIC Z- | 267.08  | 4.12 | 268.23 | C <sub>10</sub> H <sub>12</sub> N <sub>4</sub> O <sub>5</sub> | 0.186 | Inosine*                                                   | /    | -   | -   | /   | -   | +   | -   | -   | -   | Purine metabolism                        |
| HMDB0000725 | HILIC Z- | 130.058 | 2.82 | 131.13 | C <sub>5</sub> H <sub>9</sub> NO <sub>3</sub>                 | 1.106 | 4-Hydroxyproline*                                          | up   | /   | /   | /   | /   | /   | /   | /   | /   | Arginine and proline metabolism          |
| HMDB0000227 | HILIC Z- | 147.074 | 1.55 | 148.15 | C <sub>6</sub> H <sub>12</sub> O <sub>4</sub>                 | 0.189 | Mevalonic acid                                             | /    | /   | /   | +   | +   | +   | +++ | +++ | +   | Terpenoid backbone biosynthesis          |
| HMDB0034520 | HILIC Z- | 645.374 | 1.23 | 646.8  | C <sub>36</sub> H <sub>54</sub> O <sub>10</sub>               | 0.167 | Gypsogenin 3-O-β-D-glucuronide                             | /    | -   | +   | +   | +   | +   | /   | +++ | +++ | Pentose and glucuronate interconversions |
| HMDB0000024 | HILIC Z- | 890.647 | 2.36 | 891.65 | C <sub>48</sub> H <sub>93</sub> NO <sub>11</sub><br>S         | 0.750 | 3-O-Sulfogalactosylceramide<br>(d18:1/24:0) <sup>○</sup> ● | /    | --- | --- | --- | --- | --- | --- | --- | --- | Sphingolipid metabolism                  |
| HMDB0000054 | HILIC Z- | 583.266 | 1.25 | 584.66 | C <sub>33</sub> H <sub>36</sub> N <sub>4</sub> O <sub>6</sub> | 1.096 | Bilirubin                                                  | up   | -   | /   | +   | -   | -   | ++  | +   | +   | Porphyrin and chlorophyll metabolism     |
| HMDB0001644 | HILIC Z- | 149.053 | 2.55 | 150.12 | C <sub>5</sub> H <sub>10</sub> O <sub>5</sub>                 | 0.709 | D-Xylulose <sup>●</sup>                                    | /    | -   | -   | -   | -   | --- | -   | -   | -   | Pentose and glucuronate interconversions |
| HMDB0059655 | HILIC Z- | 147.038 | 1.65 | 148.11 | C <sub>5</sub> H <sub>8</sub> O <sub>5</sub>                  | 1.042 | 2-Hydroxyglutaric acid                                     | up   | -   | -   | /   | /   | -   | -   | /   | /   | Butanoate metabolism                     |
| HMDB0000001 | HILIC Z- | 168.085 | 4.96 | 169.18 | C <sub>7</sub> H <sub>11</sub> N <sub>3</sub> O <sub>2</sub>  | 1.148 | 1-Methylhistidine                                          | up   | -   | -   | /   | -   | -   | -   | +   | +   | Histidine metabolism                     |
| HMDB0001139 | HILIC Z- | 353.24  | 0.49 | 354.48 | C <sub>20</sub> H <sub>34</sub> O <sub>5</sub>                | 0.864 | Prostaglandin F2a                                          | up   | -   | -   | /   | /   | -   | /   | /   | /   | Arachidonic acid metabolism              |
| HMDB0000071 | HILIC Z- | 251.086 | 3.01 | 252.23 | C <sub>10</sub> H <sub>12</sub> N <sub>4</sub> O <sub>4</sub> | 0.443 | Deoxyinosine                                               | up   | -   | -   | /   | /   | -   | -   | -   | -   | Purine metabolism                        |
| HMDB0059731 | HILIC Z- | 155.042 | 0.9  | 156.14 | C <sub>7</sub> H <sub>8</sub> O <sub>4</sub>                  | 2.751 | 2,3-Methyleneglutaric acid <sup>Δ</sup> ●                  | down | /   | +   | +   | ++  | ++  | +   | +   | +   | /                                        |
| HMDB0059982 | HILIC Z- | 216.989 | 1.17 | 218.18 | C <sub>7</sub> H <sub>6</sub> O <sub>6</sub> S                | 2.025 | 4-hydroxybenzoic acid-4-O-sulphate <sup>Δ</sup> ○●         | up   | --  | --  | -   | -   | --- | -   | -   | -   | /                                        |



|             |          |         |      |        |                                                  |       |                                        |      |     |   |     |     |    |     |     |                                                                                  |
|-------------|----------|---------|------|--------|--------------------------------------------------|-------|----------------------------------------|------|-----|---|-----|-----|----|-----|-----|----------------------------------------------------------------------------------|
| HMDB0000459 | HILIC Z- | 156.074 | 1.51 | 157.17 | C <sub>7</sub> H <sub>11</sub> NO <sub>3</sub>   | 2.039 | 3-Methylcrotonylglycine <sup>Δ</sup>   | up   | -   | / | /   | /   | -  | /   | /   | /                                                                                |
| HMDB0000965 | HILIC Z- | 108.02  | 2.59 | 109.15 | C <sub>2</sub> H <sub>7</sub> NO <sub>2</sub> S  | 1.961 | Hypotaaurine <sup>Δ</sup> ○●           | up   | --- | - | --- | --- | -- | --- | --- | Taurine and hypotaaurine metabolism                                              |
| HMDB0000701 | HILIC Z- | 172.105 | 0.95 | 173.21 | C <sub>8</sub> H <sub>15</sub> NO <sub>3</sub>   | 0.700 | Hexanoylglycine <sup>Δ</sup>           | down | /   | / | +   | +   | /  | +   | /   | /                                                                                |
| HMDB0004827 | HILIC Z- | 142.095 | 1.42 | 143.18 | C <sub>7</sub> H <sub>13</sub> NO <sub>2</sub>   | 1.303 | Proline betaine <sup>Δ</sup>           | up   | -   | - | -   | -   | -  | -   | -   | /                                                                                |
| HMDB0006049 | HILIC Z- | 260.041 | 1.68 | 261.17 | C <sub>9</sub> H <sub>12</sub> NO <sub>6</sub> P | 1.709 | O-Phosphotyrosine <sup>Δ</sup> ●       | up   | -   | - | -   | --  | -  | -   | -   | /                                                                                |
| HMDB0170858 | HILIC Z- | 99.053  | 1.44 | 100.11 | C <sub>5</sub> H <sub>8</sub> O <sub>2</sub>     | 1.449 | 3-Methylbut-3-enoic acid <sup>Δ</sup>  | up   | -   | / | /   | /   | /  | /   | /   | /                                                                                |
| HMDB0000660 | HILIC Z- | 179.064 | 3.11 | 180.16 | C <sub>6</sub> H <sub>12</sub> O <sub>6</sub>    | 1.733 | D-Fructose <sup>Δ</sup>                | down | +   | + | +   | +   | +  | /   | +   | Amino sugar and nucleotide sugar metabolism                                      |
| HMDB0033742 | HILIC Z- | 101.068 | 1.01 | 102.13 | C <sub>5</sub> H <sub>10</sub> O <sub>2</sub>    | 1.289 | (S)-2-Methylbutanoic acid <sup>Δ</sup> | down | /   | / | +   | +   | /  | +   | +   | /                                                                                |
| HMDB0000205 | HILIC Z- | 163.047 | 0.91 | 164.16 | C <sub>9</sub> H <sub>8</sub> O <sub>3</sub>     | 1.208 | Phenylpyruvic acid <sup>Δ</sup>        | down | /   | + | +   | +   | /  | +   | +   | Phenylalanine, tyrosine and tryptophan biosynthesis;<br>Phenylalanine metabolism |

Table S4 Day36 serum metabolites information.

| HMDB        | Ion mode | m/z     | R.T.<br>(min) | Mass   | Formula                                                      | VIP   | Compound Name                          | MOD  | POS | ACL | ACH | AGL | AGH | ACP | AGP | Pathway                                                                 |
|-------------|----------|---------|---------------|--------|--------------------------------------------------------------|-------|----------------------------------------|------|-----|-----|-----|-----|-----|-----|-----|-------------------------------------------------------------------------|
| HMDB0001043 | T3(ESI+) | 305.24  | 10.3          | 304.47 | C <sub>20</sub> H <sub>32</sub> O <sub>2</sub>               | 0.872 | Arachidonic acid <sup>★</sup> ○●       | up   | ++  | +++ | +++ | +++ | +++ | +++ | +++ | Arachidonic acid metabolism;<br>Biosynthesis of unsaturated fatty acids |
| HMDB0000182 | T3(ESI+) | 147.105 | 0.59          | 146.19 | C <sub>6</sub> H <sub>14</sub> N <sub>2</sub> O <sub>2</sub> | 1.068 | L-Lysine <sup>★</sup>                  | down | ++  | +   | +   | +   | +   | +   | ++  | Aminoacyl-tRNA biosynthesis;<br>Biotin metabolism; Lysine degradation   |
| HMDB0000222 | T3(ESI+) | 400.335 | 8.49          | 399.61 | C <sub>23</sub> H <sub>45</sub> NO <sub>4</sub>              | 2.240 | L-Palmitoylecarnitine <sup>Δ</sup> ●   | down | /   | /   | /   | +   | +++ | ++  | +   | Fatty acid degradation<br>Linoleic acid metabolism;                     |
| HMDB0010403 | T3(ESI+) | 570.348 | 8.60          | 569.71 | C <sub>30</sub> H <sub>52</sub> NO <sub>7</sub> P            | 1.185 | LysoPC(22:5(7Z,10Z,13Z,16Z,19Z))<br>○● | up   | /   | ++  | -   | +++ | +++ | +   | ++  | Arachidonic acid metabolism;<br>Glycerophospholipid metabolism;         |
| HMDB0001257 | T3(ESI+) | 146.158 | 0.58          | 145.25 | C <sub>7</sub> H <sub>19</sub> N <sub>3</sub>                | 1.698 | Spermidine <sup>Δ</sup>                | down | +   | /   | /   | +   | +   | +   | /   | Arginine and proline metabolism;                                        |

|             |          |         |      |        |                                                                 |       |                                      |      |     |    |     |    |     |     |     |   |                                                                       |
|-------------|----------|---------|------|--------|-----------------------------------------------------------------|-------|--------------------------------------|------|-----|----|-----|----|-----|-----|-----|---|-----------------------------------------------------------------------|
|             |          |         |      |        |                                                                 |       |                                      |      |     |    |     |    |     |     |     |   | Histidine metabolism; beta-Alanine metabolism; Glutathione metabolism |
| HMDB0000138 | T3(ESI+) | 466.309 | 6.18 | 465.62 | C <sub>26</sub> H <sub>43</sub> NO <sub>6</sub>                 | 0.271 | Glycocholic acid                     | down | --  | -  | -   | -  | -   | -   | -   | - | Primary bile acid biosynthesis                                        |
| HMDB0002088 | T3(ESI+) | 326.298 | 8.02 | 325.53 | C <sub>20</sub> H <sub>39</sub> NO <sub>2</sub>                 | 2.187 | N-Oleoylethanolamine <sup>△○●</sup>  | down | /   | +  | +++ | ++ | +++ | +++ | +++ | / |                                                                       |
| HMDB0060012 | T3(ESI+) | 333.183 | 6.91 | 332.39 | C <sub>16</sub> H <sub>28</sub> O <sub>7</sub>                  | 2.319 | Neomenthol-glucuronide <sup>△</sup>  | down | +   | /  | +   | +  | +   | +   | +   | + | /                                                                     |
| HMDB0001173 | T3(ESI+) | 298.09  | 2.81 | 297.33 | C <sub>11</sub> H <sub>15</sub> N <sub>5</sub> O <sub>3</sub> S | 1.733 | 5'-Methylthioadenosine <sup>△</sup>  | down | /   | -  | -   | /  | /   | -   | /   |   | Cysteine and methionine metabolism                                    |
| HMDB0000043 | T3(ESI-) | 116.079 | 0.87 | 117.15 | C <sub>5</sub> H <sub>11</sub> NO <sub>2</sub>                  | 0.993 | Betaine <sup>★●</sup>                | down | +   | +  | +   | +  | ++  | +   | +   |   | Glycine, serine and threonine metabolism                              |
|             |          |         |      |        |                                                                 |       |                                      |      |     |    |     |    |     |     |     |   | Butanoate metabolism;                                                 |
| HMDB0000254 | T3(ESI-) | 117.027 | 1.24 | 118.08 | C <sub>4</sub> H <sub>6</sub> O <sub>4</sub>                    | 1.453 | Succinate <sup>★△</sup>              | down | /   | +  | +   | +  | +   | +   | +   | / | Citrate cycle (TCA cycle);                                            |
|             |          |         |      |        |                                                                 |       |                                      |      |     |    |     |    |     |     |     |   | Alanine, aspartate and glutamate metabolism;                          |
|             |          |         |      |        |                                                                 |       |                                      |      |     |    |     |    |     |     |     |   | Propanoate metabolism                                                 |
| HMDB0000094 | T3(ESI-) | 191.027 | 1.07 | 192.12 | C <sub>6</sub> H <sub>8</sub> O <sub>7</sub>                    | 0.458 | Citrate <sup>★</sup>                 | up   | +   | +  | -   | +  | +   | +   | -   |   | Alanine, aspartate and glutamate metabolism;                          |
|             |          |         |      |        |                                                                 |       |                                      |      |     |    |     |    |     |     |     |   | Citrate cycle (TCA cycle);                                            |
|             |          |         |      |        |                                                                 |       |                                      |      |     |    |     |    |     |     |     |   | Glyoxylate and dicarboxylate metabolism                               |
| HMDB0000827 | T3(ESI-) | 283.271 | 9.46 | 284.48 | C <sub>18</sub> H <sub>36</sub> O <sub>2</sub>                  | 1.270 | Stearic acid <sup>★△</sup>           | up   | /   | /  | -   | -  | -   | -   | -   |   | /                                                                     |
|             |          |         |      |        |                                                                 |       |                                      |      |     |    |     |    |     |     |     |   | Taurine and hypotaurine metabolism;                                   |
| HMDB0000251 | T3(ESI-) | 124.015 | 0.70 | 125.15 | C <sub>2</sub> H <sub>7</sub> NO <sub>3</sub> S                 | 1.008 | Taurine <sup>★△○</sup>               | down | +++ | ++ | +   | +  | +   | /   | +   |   | Primary bile acid biosynthesis                                        |
|             |          |         |      |        |                                                                 |       |                                      |      |     |    |     |    |     |     |     |   | Butanoate metabolism;                                                 |
| HMDB0000357 | T3(ESI-) | 103.047 | 1.62 | 104.1  | C <sub>4</sub> H <sub>8</sub> O <sub>3</sub>                    | 0.253 | (R)-3-Hydroxybutanoate <sup>★●</sup> | down | +   | +  | +   | /  | ++  | ++  | ++  |   | Synthesis and degradation of ketone bodies                            |
|             |          |         |      |        |                                                                 |       |                                      |      |     |    |     |    |     |     |     |   | Butanoate metabolism;                                                 |
|             |          |         |      |        |                                                                 |       |                                      |      |     |    |     |    |     |     |     |   | Arginine and proline metabolism;                                      |
|             |          |         |      |        |                                                                 |       |                                      |      |     |    |     |    |     |     |     |   | Aminoacyl-tRNA biosynthesis;                                          |
| HMDB0000148 | T3(ESI-) | 146.053 | 0.74 | 147.13 | C <sub>5</sub> H <sub>9</sub> NO <sub>4</sub>                   | 0.824 | L-Glutamic acid <sup>★△</sup>        | up   | /   | /  | /   | /  | -   | /   | -   |   | D-Glutamine and D-glutamate metabolism;                               |
|             |          |         |      |        |                                                                 |       |                                      |      |     |    |     |    |     |     |     |   | Alanine, aspartate and glutamate metabolism;                          |
|             |          |         |      |        |                                                                 |       |                                      |      |     |    |     |    |     |     |     |   | Arginine biosynthesis; Histidine metabolism;                          |
|             |          |         |      |        |                                                                 |       |                                      |      |     |    |     |    |     |     |     |   | Nitrogen metabolism; Glutathione metabolism;                          |

|             |          |         |      |        |                                                             |       |                                               |      |     |     |     |     |     |     |     |                                                                                                                                                                                                                                                                                                                                                                                                                                                                                    |
|-------------|----------|---------|------|--------|-------------------------------------------------------------|-------|-----------------------------------------------|------|-----|-----|-----|-----|-----|-----|-----|------------------------------------------------------------------------------------------------------------------------------------------------------------------------------------------------------------------------------------------------------------------------------------------------------------------------------------------------------------------------------------------------------------------------------------------------------------------------------------|
| HMDB0000177 | T3(ESI-) | 154.069 | 0.66 | 155.15 | C <sub>6</sub> H <sub>9</sub> N <sub>3</sub> O <sub>2</sub> | 0.965 | L-Histidine <sup>★</sup>                      | up   | ++  | -   | /   | +   | +   | +   | +   | Glyoxylate and dicarboxylate metabolism;<br>Glycine, serine and threonine metabolism;<br>Porphyrin and chlorophyll metabolism<br>Aminoacyl-tRNA biosynthesis; Histidine<br>metabolism; beta-Alanine metabolism<br>Aminoacyl-tRNA biosynthesis;<br>Phenylalanine, tyrosine and tryptophan<br>biosynthesis; Phenylalanine metabolism;<br>Tyrosine metabolism;<br>Ubiquinone and other terpenoid-quinone<br>biosynthesis;<br>Arachidonic acid metabolism<br>Linoleic acid metabolism; |
| HMDB0000159 | T3(ESI-) | 180.074 | 1.21 | 181.19 | C <sub>9</sub> H <sub>11</sub> NO <sub>3</sub>              | 0.314 | L-Tyrosine <sup>★○</sup>                      | down | /   | --  | -   | -   | -   | -   | --- | Arachidonic acid metabolism;<br>Linoleic acid metabolism;<br>Arachidonic acid metabolism;<br>Glycerophospholipid metabolism;<br>alpha-Linolenic acid metabolism<br>Linoleic acid metabolism;<br>Arachidonic acid metabolism;<br>Glycerophospholipid metabolism;<br>alpha-Linolenic acid metabolism                                                                                                                                                                                 |
| HMDB0001220 | T3(ESI-) | 351.224 | 7.85 | 352.47 | C <sub>20</sub> H <sub>32</sub> O <sub>5</sub>              | 0.477 | Prostaglandin E2 <sup>★</sup>                 | down | +++ | +   | /   | /   | +   | +   | -   | Arachidonic acid metabolism;<br>Linoleic acid metabolism;                                                                                                                                                                                                                                                                                                                                                                                                                          |
| HMDB0008328 | T3(ESI-) | 756.563 | 9.38 | 758.06 | C <sub>42</sub> H <sub>80</sub> NO <sub>8</sub> P           | 2.534 | PC(20:2(11Z,14Z)/14:0) <sup>△○●</sup>         | down | +++ | +   | ++  | ++  | +   | +   | +++ | Arachidonic acid metabolism;<br>Glycerophospholipid metabolism;<br>alpha-Linolenic acid metabolism<br>Linoleic acid metabolism;<br>Arachidonic acid metabolism;<br>Glycerophospholipid metabolism;<br>alpha-Linolenic acid metabolism                                                                                                                                                                                                                                              |
| HMDB0010388 | T3(ESI-) | 516.317 | 8.25 | 517.64 | C <sub>26</sub> H <sub>48</sub> NO <sub>7</sub> P           | 1.903 | LysoPC(18:3(9Z,12Z,15Z)) <sup>△○●</sup>       | up   | --- | -   | --- | --  | --- | --  | -   | Biosynthesis of unsaturated fatty acids                                                                                                                                                                                                                                                                                                                                                                                                                                            |
| HMDB0000394 | T3(ESI-) | 273.178 | 6.66 | 274.35 | C <sub>14</sub> H <sub>26</sub> O <sub>5</sub>              | 1.987 | 3-Hydroxytetradecanedioic acid <sup>△○●</sup> | down | +++ | +++ | +++ | +++ | +++ | +++ | +++ | Biosynthesis of unsaturated fatty acids                                                                                                                                                                                                                                                                                                                                                                                                                                            |
| HMDB0001644 | T3(ESI-) | 149.053 | 0.75 | 150.13 | C <sub>5</sub> H <sub>10</sub> O <sub>5</sub>               | 0.614 | D-Xylulose <sup>○●</sup>                      | up   | +++ | +++ | +++ | +++ | +++ | +++ | +++ | Pentose and glucuronate interconversions                                                                                                                                                                                                                                                                                                                                                                                                                                           |
| HMDB0011134 | T3(ESI-) | 319.235 | 9.14 | 320.47 | C <sub>20</sub> H <sub>32</sub> O <sub>3</sub>              | 0.286 | 5-HETE <sup>●</sup>                           | /    | +   | -   | -   | --  | -   | -   | -   | Arachidonic acid metabolism                                                                                                                                                                                                                                                                                                                                                                                                                                                        |

|             |          |         |      |        |                                                   |       |                                                |      |     |     |     |     |     |     |     |     |                                                                                                                        |
|-------------|----------|---------|------|--------|---------------------------------------------------|-------|------------------------------------------------|------|-----|-----|-----|-----|-----|-----|-----|-----|------------------------------------------------------------------------------------------------------------------------|
| HMDB0000122 | T3(ESI-) | 179.063 | 0.68 | 180.16 | C <sub>6</sub> H <sub>12</sub> O <sub>6</sub>     | 1.039 | D-Glucose <sup>○●</sup>                        | down | +++ | +++ | +++ | +++ | +++ | +++ | +++ | +++ | Neomycin, kanamycin and gentamicin biosynthesis; Starch and sucrose metabolism; Galactose metabolism                   |
| HMDB0007913 | T3(ESI-) | 754.545 | 9.14 | 756.04 | C <sub>42</sub> H <sub>78</sub> NO <sub>8</sub> P | 0.640 | PC(14:1(9Z)/20:2(11Z,14Z)) ●                   | up   | +++ | /   | -   | -   | --  | -   | -   | -   | Linoleic acid metabolism; Arachidonic acid metabolism; Glycerophospholipid metabolism; alpha-Linolenic acid metabolism |
| HMDB0013413 | T3(ESI-) | 741.565 | 9.12 | 742.06 | C <sub>42</sub> H <sub>80</sub> NO <sub>7</sub> P | 0.140 | PC(o-16:1(9Z)/18:2(9Z,12Z)) ●                  | down | +++ | +   | -   | /   | --  | -   | -   | -   | Linoleic acid metabolism; Arachidonic acid metabolism; Glycerophospholipid metabolism; alpha-Linolenic acid metabolism |
| HMDB0011213 | T3(ESI-) | 739.551 | 9.12 | 740.04 | C <sub>42</sub> H <sub>78</sub> NO <sub>7</sub> P | 0.309 | PC(P-16:0/18:3(9Z,12Z,15Z))                    | up   | +++ | /   | -   | /   | -   | -   | /   | /   | Linoleic acid metabolism; Arachidonic acid metabolism; Glycerophospholipid metabolism; alpha-Linolenic acid metabolism |
| HMDB0008140 | T3(ESI-) | 779.546 | 9.14 | 780.07 | C <sub>44</sub> H <sub>78</sub> NO <sub>8</sub> P | 0.219 | PC(18:2(9Z,12Z)/18:3(6Z,9Z,12Z)) <sup>○●</sup> | up   | ++  | /   | --  | -   | --- | -   | -   | -   | Linoleic acid metabolism; Arachidonic acid metabolism; Glycerophospholipid metabolism; alpha-Linolenic acid metabolism |
| HMDB0010381 | T3(ESI-) | 480.317 | 8.84 | 481.32 | C <sub>23</sub> H <sub>48</sub> NO <sub>7</sub> P | 0.871 | LysoPC(15:0) <sup>△○●</sup>                    | up   | /   | -   | --  | --- | --  | -   | /   | /   | Linoleic acid metabolism; Arachidonic acid metabolism; Glycerophospholipid metabolism; alpha-Linolenic acid metabolism |
| HMDB0008175 | T3(ESI-) | 811.605 | 9.6  | 812.15 | C <sub>46</sub> H <sub>86</sub> NO <sub>8</sub> P | 0.515 | PC(18:3(6Z,9Z,12Z)/20:0) ●                     | up   | +++ | -   | -   | -   | --- | -   | --  | --  | Linoleic acid metabolism; Arachidonic acid metabolism; Glycerophospholipid metabolism;                                 |

|             |                  |         |      |        |                                                              |       |                                       |      |    |     |     |     |     |     |     |  |                                                                                   |
|-------------|------------------|---------|------|--------|--------------------------------------------------------------|-------|---------------------------------------|------|----|-----|-----|-----|-----|-----|-----|--|-----------------------------------------------------------------------------------|
|             |                  |         |      |        |                                                              |       |                                       |      |    |     |     |     |     |     |     |  | alpha-Linolenic acid metabolism                                                   |
|             |                  |         |      |        |                                                              |       |                                       |      |    |     |     |     |     |     |     |  | Linoleic acid metabolism;                                                         |
| HMDB0010408 | T3(ESI-)         | 505.353 | 9.25 | 505.67 | C <sub>26</sub> H <sub>52</sub> NO <sub>6</sub> P            | 1.224 | LysoPC(P-18:1(9Z)) <sup>Δ</sup>       | up   | /  | /   | /   | /   | -   | /   | /   |  | Arachidonic acid metabolism;                                                      |
|             |                  |         |      |        |                                                              |       |                                       |      |    |     |     |     |     |     |     |  | Glycerophospholipid metabolism;                                                   |
|             |                  |         |      |        |                                                              |       |                                       |      |    |     |     |     |     |     |     |  | alpha-Linolenic acid metabolism                                                   |
|             |                  |         |      |        |                                                              |       |                                       |      |    |     |     |     |     |     |     |  | Linoleic acid metabolism;                                                         |
| HMDB0008139 | T3(ESI-)         | 807.573 | 9.21 | 808.12 | C <sub>46</sub> H <sub>82</sub> NO <sub>8</sub> P            | 0.391 | PC(18:2(9Z,12Z)/20:3(5Z,8Z,11Z))<br>● | up   | ++ | +   | -   | -   | --  | -   | -   |  | Arachidonic acid metabolism;                                                      |
|             |                  |         |      |        |                                                              |       |                                       |      |    |     |     |     |     |     |     |  | Glycerophospholipid metabolism;                                                   |
|             |                  |         |      |        |                                                              |       |                                       |      |    |     |     |     |     |     |     |  | alpha-Linolenic acid metabolism                                                   |
| HMDB0000267 | T3(ESI-)         | 128.043 | 1.13 | 129.11 | C <sub>5</sub> H <sub>7</sub> NO <sub>3</sub>                | 0.361 | 5-Oxo-D-proline                       | up   | /  | +   | +   | /   | +   | +   | ++  |  | D-Glutamine and D-glutamate metabolism                                            |
| HMDB0004243 | T3(ESI-)         | 336.23  | 8.24 | 336.46 | C <sub>20</sub> H <sub>32</sub> O <sub>4</sub>               | 0.204 | 12(S)-HPETE <sup>●</sup>              | up   | /  | /   | -   | -   | --  | -   | --  |  | Arachidonic acid metabolism                                                       |
| HMDB0061864 | T3(ESI-)         | 279.24  | 8.43 | 280.45 | C <sub>18</sub> H <sub>32</sub> O <sub>2</sub>               | 0.951 | Linoleate                             | down | -  | +   | -   | +   | -   | +   | +   |  | Linoleic acid metabolism;                                                         |
|             |                  |         |      |        |                                                              |       |                                       |      |    |     |     |     |     |     |     |  | Biosynthesis of unsaturated fatty acids                                           |
| HMDB0062652 | T3(ESI-)         | 295.235 | 8.92 | 296.45 | C <sub>18</sub> H <sub>32</sub> O <sub>3</sub>               | 0.599 | 9(10)-EpOME                           | up   | +  | /   | /   | -   | -   | /   | -   |  | Linoleic acid metabolism                                                          |
| HMDB0000036 | T3(ESI-)         | 514.292 | 6.45 | 515.7  | C <sub>26</sub> H <sub>45</sub> NO <sub>7</sub> S            | 0.017 | Taurocholic acid                      | /    | +  | -   | -   | +   | +   | +   | ++  |  | Taurine and hypotaurine metabolism;                                               |
|             |                  |         |      |        |                                                              |       |                                       |      |    |     |     |     |     |     |     |  | Primary bile acid biosynthesis                                                    |
|             |                  |         |      |        |                                                              |       |                                       |      |    |     |     |     |     |     |     |  | Butanoate metabolism;                                                             |
| HMDB0000112 | Hilic<br>Z(ESI+) | 104.102 | 1.23 | 145.16 | C <sub>4</sub> H <sub>9</sub> NO <sub>2</sub>                | 1.112 | 4-Aminobutanoate <sup>*○●</sup>       | /    | /  | --- | --- | --- | --- | --- | --- |  | Arginine and proline metabolism;                                                  |
|             |                  |         |      |        |                                                              |       |                                       |      |    |     |     |     |     |     |     |  | Alanine, aspartate and glutamate metabolism                                       |
|             |                  |         |      |        |                                                              |       |                                       |      |    |     |     |     |     |     |     |  | Arginine and proline metabolism;                                                  |
| HMDB0000517 | Hilic<br>Z(ESI+) | 175.118 | 5.24 | 174.2  | C <sub>6</sub> H <sub>14</sub> N <sub>4</sub> O <sub>2</sub> | 1.744 | L-Arginine <sup>*Δ</sup>              | down | +  | /   | /   | /   | /   | ++  | +   |  | Aminoacyl-tRNA biosynthesis; Arginine biosynthesis                                |
|             |                  |         |      |        |                                                              |       |                                       |      |    |     |     |     |     |     |     |  | Aminoacyl-tRNA biosynthesis; Phenylalanine, tyrosine and tryptophan biosynthesis; |
| HMDB0000159 | Hilic<br>Z(ESI+) | 166.082 | 1.44 | 165.19 | C <sub>9</sub> H <sub>11</sub> NO <sub>2</sub>               | 0.989 | L-Phenylalanine <sup>*</sup>          | down | -  | +   | +   | -   | -   | -   | --- |  | Phenylalanine metabolism                                                          |

|             |                  |         |      |        |                                                             |       |                                  |      |    |     |     |     |     |     |     |                                                                                                                                                                      |
|-------------|------------------|---------|------|--------|-------------------------------------------------------------|-------|----------------------------------|------|----|-----|-----|-----|-----|-----|-----|----------------------------------------------------------------------------------------------------------------------------------------------------------------------|
| HMDB0000162 | Hilic<br>Z(ESI+) | 116.064 | 1.98 | 115.13 | C <sub>5</sub> H <sub>9</sub> NO <sub>2</sub>               | 1.158 | L-Proline <sup>★○●</sup>         | down | /  | --- | --- | --- | -   | +   | -   | Arginine and proline metabolism;<br>Aminoacyl-tRNA biosynthesis                                                                                                      |
| HMDB0000210 | Hilic<br>Z(ESI-) | 218.111 | 0.92 | 219.24 | C <sub>9</sub> H <sub>17</sub> NO <sub>5</sub>              | 0.120 | Pantothenate <sup>★</sup>        | /    | +  | -   | /   | /   | /   | +++ | +++ | Pantothenate and CoA biosynthesis                                                                                                                                    |
| HMDB0000208 | Hilic<br>Z(ESI-) | 145.105 | 5.66 | 146.1  | C <sub>5</sub> H <sub>6</sub> O <sub>5</sub>                | 0.105 | 2-Oxoglutarate <sup>★●</sup>     | /    | ++ | +   | +   | +   | ++  | +   | +   | Butanoate metabolism;<br>D-Glutamine and D-glutamate metabolism;<br>Alanine, aspartate and glutamate metabolism;<br>Arginine biosynthesis; Citrate cycle (TCA cycle) |
| HMDB0000064 | Hilic<br>Z(ESI-) | 130.058 | 1.33 | 131.13 | C <sub>4</sub> H <sub>9</sub> N <sub>3</sub> O <sub>2</sub> | 1.360 | Creatine <sup>★△○●</sup>         | down | ++ | +   | ++  | +++ | +++ | +++ | +++ | Arginine and proline metabolism                                                                                                                                      |
| HMDB0000725 | Hilic<br>Z(ESI-) | 130.059 | 2.8  | 131.13 | C <sub>5</sub> H <sub>9</sub> NO <sub>3</sub>               | 2.895 | 4-Hydroxyproline <sup>★△○●</sup> | up   | -  | --- | --  | -   | --  | -   | -   | Arginine and proline metabolism                                                                                                                                      |

Table S5 Topological information of urine metabolites in various periods

| Topological information    | Day7  | Day21 | Day35 |
|----------------------------|-------|-------|-------|
| network centralization     | 0.266 | 0.205 | 0.527 |
| Avg. number of neighbors   | 1.694 | 1.632 | 2.181 |
| characteristic path length | 1.486 | 1.429 | 1.747 |
| network density            | 0.044 | 0.042 | 0.020 |
| numbers of nodes           | 35    | 35    | 87    |
| numbers of edges           | 27    | 27    | 87    |

Table S6 The importance of input nodes in modular network

|             | KEGG   | Metabolites                                                        | Degree | Betweenness centrality |
|-------------|--------|--------------------------------------------------------------------|--------|------------------------|
| Day7 urine  | C02946 | 4-Acetamidobutanoate                                               | 1      | 0                      |
|             | C01019 | 6-Deoxy-L-galactose (L-Fucose)                                     | 2      | 1                      |
|             | C06424 | Tetradecanoic acid (Myristic acid)                                 | 2      | 1                      |
|             | C00312 | L-Xylulose                                                         | 1      | 0                      |
|             | C05298 | 2-Hydroxyestrone                                                   | 4      | 1                      |
|             | C00106 | Uracil                                                             | 4      | 1                      |
|             | C03758 | 4-(2-Aminoethyl)-1,2-benzenediol (Dopamine)                        | 11     | 1                      |
|             | C05828 | Methylimidazoleacetic acid                                         | 1      | 0                      |
|             | C00763 | D-Proline                                                          | 1      | 0                      |
| Day21 urine | C02946 | 4-Acetamidobutanoate                                               | 1      | 0                      |
|             | C05584 | 3-Methoxy-4-hydroxymandelate<br>(4-Hydroxy-3-methoxymandelic acid) | 5      | 1                      |
|             | C01089 | (R)-3-Hydroxybutanoate                                             | 1      | 0                      |
|             | C00780 | 3-(2-Aminoethyl)-1H-indol-5-ol (Serotonin)                         | 5      | 1                      |
|             | C01586 | Hippurate (2-Methylhippuric acid)                                  | 1      | 0                      |
|             | C01595 | Linoleate                                                          | 8      | 1                      |
|             | C05643 | 6-Hydroxymelatonin                                                 | 2      | 1                      |
|             | C00312 | L-Xylulose                                                         | 1      | 0                      |
|             | C00864 | Pantothenate                                                       | 1      | 0                      |
| Day35 urine | C06424 | Tetradecanoic acid (Myristic acid)                                 | 2      | 1                      |
|             | C05476 | Tetrahydrocorticosterone                                           | 4      | 1                      |
|             | C01089 | (R)-3-Hydroxybutanoate                                             | 1      | 0                      |
|             | C06424 | Tetradecanoic acid (Myristic acid)                                 | 2      | 1                      |
|             | C00166 | Phenylpyruvate                                                     | 7      | 1                      |
|             | C00532 | L-Arabitol                                                         | 2      | 0                      |
|             | C05634 | 5-Hydroxyindoleacetaldehyde                                        | 5      | 0.1175                 |
|             | C00037 | Glycine                                                            | 49     | 0.9918                 |
|             | C02714 | N-Acetylputrescine                                                 | 2      | 1                      |
|             | C05587 | 3-Methoxytyramine                                                  | 3      | 1                      |
|             | C02336 | Fructose                                                           | 3      | 1                      |
|             | C00735 | Cortisol                                                           | 8      | 1                      |
|             | C00519 | Hypotaurine                                                        | 1      | 0                      |

|             |        |                                                                   |    |        |
|-------------|--------|-------------------------------------------------------------------|----|--------|
| Day36 serum | C00025 | L-Glutamate                                                       | 39 | 0.7721 |
|             | C00042 | Succinate                                                         | 11 | 0.5987 |
|             | C00062 | L-Arginine                                                        | 16 | 0.4916 |
|             | C00157 | Phosphatidylcholine (PC(20:2(11Z,14Z)/14:0) )                     | 23 | 0.9444 |
|             | C00170 | 5'-Methylthioadenosine                                            | 8  | 0.2390 |
|             | C00245 | Taurine                                                           | 10 | 1      |
|             | C00300 | Creatine                                                          | 2  | 0.0357 |
|             | C00315 | Spermidine                                                        | 18 | 0.9007 |
|             | C01157 | trans-4-Hydroxy-L-proline                                         | 4  | 1      |
|             | C01530 | Octadecanoic acid (Stearic acid)                                  | 1  | 0      |
|             | C02990 | L-Palmitoylcarnitine                                              | 1  | 0      |
|             | C04230 | 1-Acyl-sn-glycero-3-phosphocholine<br>(LysoPC(18:3(9Z,12Z,15Z)) ) | 7  | 0.1209 |

Table S7 Oral bioavailability prediction of AdmetSAR2.0 web-survice

| Compound   | Structure                                                                           | Formula                                          | MW     | F/% |
|------------|-------------------------------------------------------------------------------------|--------------------------------------------------|--------|-----|
| arctiin    | 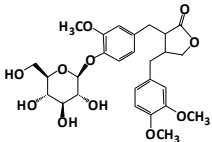  | C <sub>27</sub> H <sub>34</sub> O <sub>11</sub>  | 534.55 | 75  |
| arctigenin |  | C <sub>21</sub> H <sub>24</sub> O <sub>6</sub>   | 372.41 | 58  |
| M1         |  | C <sub>21</sub> H <sub>26</sub> O <sub>7</sub>   | 390.43 | 58  |
| M2         |  | C <sub>21</sub> H <sub>24</sub> O <sub>9</sub> S | 452.47 | 54  |
| M3         |  | C <sub>20</sub> H <sub>22</sub> O <sub>6</sub>   | 358.39 | 64  |
| M4         |  | C <sub>21</sub> H <sub>24</sub> O <sub>5</sub>   | 356.41 | 58  |
| M5         |  | C <sub>18</sub> H <sub>18</sub> O <sub>6</sub>   | 330.33 | 58  |



|     |                                                                                     |                   |        |    |
|-----|-------------------------------------------------------------------------------------|-------------------|--------|----|
| M6  | 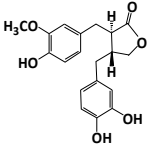   | $C_{19}H_{20}O_6$ | 344.36 | 64 |
| M7  |    | $C_{19}H_{20}O_6$ | 344.36 | 64 |
| M8  |    | $C_{19}H_{20}O_6$ | 344.36 | 61 |
| M9  |    | $C_{18}H_{18}O_5$ | 314.33 | 61 |
| M10 |   | $C_{20}H_{22}O_6$ | 358.39 | 59 |
| M11 |  | $C_{20}H_{22}O_6$ | 358.39 | 66 |
| M12 |  | $C_{20}H_{22}O_5$ | 342.39 | 61 |
| M13 |  | $C_{18}H_{18}O_4$ | 298.33 | 59 |
| M14 |  | $C_{19}H_{20}O_5$ | 328.36 | 63 |

Table S8 XP Gscore of molecular docking studies

| No. | Compound   | Structure                                                                            | XP GScore |
|-----|------------|--------------------------------------------------------------------------------------|-----------|
| 1   | arctigenin | 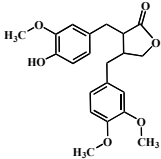 | -5.69550  |

|   |                                                                        |                                                                                     |          |
|---|------------------------------------------------------------------------|-------------------------------------------------------------------------------------|----------|
| 2 | 3'-desmethyl-arctigenin                                                | 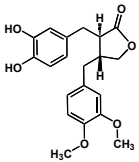  | -6.40341 |
| 3 | 4',4''-dihydroxyl-enterolactone                                        |   | -9.20234 |
| 4 | (2R,3R)-2-(3'-hydroxybenzyl)-3-(3'',4''-dihydroxybenzyl) butyrolactone |   | -8.42564 |
| 5 | (-)-enterolactone                                                      |   | -7.89611 |
| 6 | arctiin                                                                |  | -7.34449 |
